# Supplementary material for: Carbon monoxide formation from trimethylamine-boranecarboxylate: DFT studies of SNi and chelotropic mechanisms
Source: Royal Society of Chemistry journal article supplement (doi:10.1039/d0ra01572e), 2020-01-01
Supplement: d0ra01572e1.pdf [file d0ra01572e1.pdf]

ESI

## Carbon monoxide formation from trimethylamine-boranecarboxylate: DFT studies of $S_{Ni}$ and chelotropic mechanisms

John W. Keller<sup>1\*</sup> Theppawut I. Ayudhya<sup>2</sup> Nin N. Dingra<sup>2</sup>

<sup>1</sup>Department of Chemistry and Biochemistry, University of Alaska Fairbanks, Fairbanks, AK 99775-6160 USA

<sup>2</sup>Department of Chemistry, University of Texas of the Permian Basin, Odessa, TX 79762 USA

\*Email: jwkeller@alaska.edu

### ELECTRONIC SUPPORTING INFORMATION

| Figure | Contents                                                                                                             | page |
|--------|----------------------------------------------------------------------------------------------------------------------|------|
| S1     | Van der Waals complex of trimethylamine with carboxyborane anion                                                     | 2    |
| S2     | Comparing M06-2X geometries for four basis sets                                                                      | 3    |
| S3     | Secondary orbital donor-acceptor interactions in trimethylamine carboxyboranes                                       | 4    |
| S4     | Atoms-in-molecules analysis of $BH_2COO^-$ and $\alpha$ -acetolactone                                                | 4    |
| S5     | Transition states and energies for internal rotation and inversion of carboxyborane anion and $\alpha$ -acetolactone | 5    |
| S6     | Donor-acceptor orbital interactions in transition state for chelotropic extrusion of CO from $BH_2COO^-$             | 6    |
| S7     | Two- and three-water TMA- $BH_2COO^-$ complexes and $S_{Ni}$ transition states                                       | 6    |
| S8     | Plots of activation barriers and $S_{Ni}$ reaction free energy vs. model chemistry                                   | 7    |
| S9     | Geometries and energy changes for chelotropic rxn of $BH_2COO^-$ , $\alpha$ -acetolactone, and dit-butylcyclopropane | 8    |
| S10    | Mulliken atomic charge analysis of TMA- $BH_2COO^-$ , 2-water complex, and related transition states.                | 9    |
| Table  |                                                                                                                      |      |
| S1     | Transition state imaginary frequencies                                                                               | 10   |
| S2     | Energy and entropy of reactants, intermediates, transition states and products                                       | 10   |
| S3     | Cartesian coordinates of ground and transition states in gas and aqueous phases, M06-2X/6-311++G(2,p)                | 11   |
| S4     | Cartesian coordinates of ground and transition states in aqueous phase, M06-2X/jun-, jul-, and aug-cc-pVTZ           | 16   |
| S5     | Gas phase energies of 3-membered ring decarbonylation reactants, transition states and products                      | 20   |
| S6     | Absolute energies and decarbonylation energy changes for 3-membered ring compounds                                   | 20   |
| S7     | Cartesian coordinates of 3-membered ring compds and transition states M06-2X/6-311++G(2,p), gas phase                | 21   |

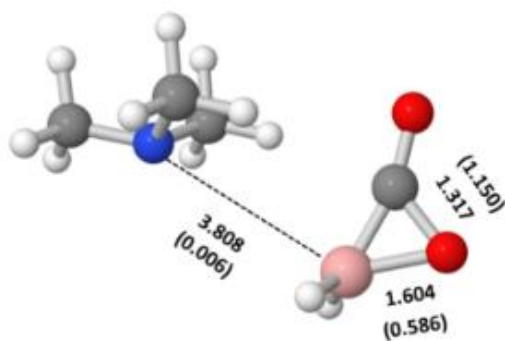

|                            | TMA..BH <sub>2</sub> COO <sup>-</sup> (vdW) |  |
|----------------------------|---------------------------------------------|--|
| PCM/M06-2X/6-311++G(2d,p)  |                                             |  |
| E <sub>elect</sub> (a.u.)  | -389.174907                                 |  |
| ZPE                        | 0.154664                                    |  |
| Internal energy            | -389.009016                                 |  |
| Enthalpy                   | -389.008072                                 |  |
| Gibbs free energy          | -389.059841                                 |  |
| PCM/CCSD(T)/6-311++G(2d,p) |                                             |  |
| E <sub>elect</sub> (a.u.)  | -388.420672                                 |  |
| Internal energy            | -388.254782                                 |  |
| Enthalpy                   | -388.253838                                 |  |
| Gibbs free energy          | -388.305607                                 |  |

**Figure S1.** Van der Waals complex of trimethylamine with carboxyborane anion (C<sub>s</sub>). Distance in Å; Wiberg bond order in parentheses.

**Figure S2.** Comparing M06-2X optimized geometries for four basis sets.

|                      | 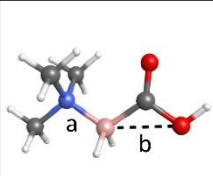<br>Trimethylamine borane |       | <br>Trimethylamine boranecarboxylate |       | <br>Water-trimethylamine boranecarboxylate |       |       |
|----------------------|------------------------------------------------------------------------------------------------------------|-------|-----------------------------------------------------------------------------------------------------------------------|-------|------------------------------------------------------------------------------------------------------------------------------|-------|-------|
| Basis set            | a                                                                                                          | b     | a                                                                                                                     | b     | a                                                                                                                            | b     | c     |
| 6-311++G(2d,p) (gas) | 1.623                                                                                                      | 2.465 | 1.674                                                                                                                 | 2.444 | 1.658                                                                                                                        | 2.462 | 1.666 |
| 6-311++G(2d,p)       | 1.607                                                                                                      | 2.460 | 1.630                                                                                                                 | 2.455 | 1.623                                                                                                                        | 2.467 | 1.600 |
| jun-cc-pVTZ          | 1.608                                                                                                      | 2.459 | 1.631                                                                                                                 | 2.454 | 1.624                                                                                                                        | 2.466 | 1.602 |
| jul-cc-pVTZ          | 1.608                                                                                                      | 2.459 | 1.631                                                                                                                 | 2.454 | 1.624                                                                                                                        | 2.466 | 1.608 |
| aug-cc-pVTZ          | 1.608                                                                                                      | 2.459 | 1.631                                                                                                                 | 2.454 | 1.624                                                                                                                        | 2.465 | 1.603 |

|                      | 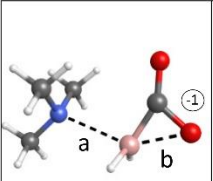<br>Trimethylamine boranecarboxylate $S_Ni$ transition state |       | <br>Water-trimethylamine boranecarboxylate $S_Ni$ transition state |       |       | <br>Carboxyborane anion |       |       | <br>Water-carboxyborane anion |       |       |       |
|----------------------|-----------------------------------------------------------------------------------------------------------------------------------------------|-------|-----------------------------------------------------------------------------------------------------------------------------------------------------|-------|-------|-----------------------------------------------------------------------------------------------------------|-------|-------|------------------------------------------------------------------------------------------------------------------|-------|-------|-------|
| Basis set            | a                                                                                                                                             | b     | a                                                                                                                                                   | b     | c     | a                                                                                                         | b     | c     | a                                                                                                                | b     | c     | d     |
| 6-311++G(2d,p) (gas) | 2.436                                                                                                                                         | 2.006 | 2.453                                                                                                                                               | 1.963 | 1.829 | 1.583                                                                                                     | 1.546 | 1.322 | 1.588                                                                                                            | 1.544 | 1.336 | 1.914 |
| 6-311++G(2d,p)       | 2.574                                                                                                                                         | 1.864 | 2.607                                                                                                                                               | 1.846 | 1.793 | 1.600                                                                                                     | 1.543 | 1.316 | 1.609                                                                                                            | 1.542 | 1.331 | 1.844 |
| jun-cc-pVTZ          | 2.550                                                                                                                                         | 1.857 | 2.599                                                                                                                                               | 1.836 | 1.784 | 1.595                                                                                                     | 1.543 | 1.318 | 1.606                                                                                                            | 1.541 | 1.330 | 1.837 |
| jul-cc-pVTZ          | 2.551                                                                                                                                         | 1.855 | 2.600                                                                                                                                               | 1.835 | 1.785 | 1.595                                                                                                     | 1.543 | 1.318 | 1.606                                                                                                            | 1.541 | 1.330 | 1.837 |
| aug-cc-pVTZ          | 2.551                                                                                                                                         | 1.855 | 2.600                                                                                                                                               | 1.834 | 1.784 | 1.595                                                                                                     | 1.543 | 1.318 | 1.606                                                                                                            | 1.541 | 1.330 | 1.836 |

|                    | 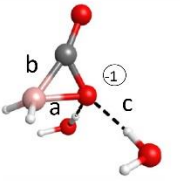<br>Two-water-carboxyborane anion |       |       | <br>Carboxyborane anion CO-loss transition state |       |       | <br>Water-carboxyborane anion CO-loss transition state |       |       |       | <br>Two-water-carboxyborane anion CO-loss transition state |       |       |       |
|--------------------|----------------------------------------------------------------------------------------------------------------------|-------|-------|-------------------------------------------------------------------------------------------------------------------------------------|-------|-------|--------------------------------------------------------------------------------------------------------------------------------------------|-------|-------|-------|-------------------------------------------------------------------------------------------------------------------------------------------------|-------|-------|-------|
| Basis set          | a                                                                                                                    | b     | c     | a                                                                                                                                   | b     | c     | a                                                                                                                                          | b     | c     | d     | a                                                                                                                                               | b     | c     | d     |
| 6-311++G(2d,p) gas | 1.592                                                                                                                | 1.541 | 1.945 | 1.362                                                                                                                               | 1.783 | 1.919 | 1.393                                                                                                                                      | 1.682 | 1.944 | 1.604 | 1.421                                                                                                                                           | 1.635 | 1.908 | 1.682 |
| 6-311++G(2d,p)     | 1.618                                                                                                                | 1.540 | 1.855 | 1.401                                                                                                                               | 1.654 | 1.938 | 1.438                                                                                                                                      | 1.603 | 1.878 | 1.542 | 1.463                                                                                                                                           | 1.580 | 1.826 | 1.623 |
| jun-cc-pVTZ        | 1.616                                                                                                                | 1.539 | 1.857 | 1.398                                                                                                                               | 1.662 | 1.958 | 1.436                                                                                                                                      | 1.606 | 1.892 | 1.542 | 1.462                                                                                                                                           | 1.580 | 1.834 | 1.618 |
| jul-cc-pVTZ        | 1.615                                                                                                                | 1.539 | 1.856 | 1.398                                                                                                                               | 1.662 | 1.958 | 1.435                                                                                                                                      | 1.606 | 1.893 | 1.541 | 1.462                                                                                                                                           | 1.580 | 1.834 | 1.618 |
| aug-cc-pVTZ        | 1.615                                                                                                                | 1.539 | 1.855 | 1.398                                                                                                                               | 1.662 | 1.958 | 1.435                                                                                                                                      | 1.606 | 1.892 | 1.540 | 1.462                                                                                                                                           | 1.580 | 1.834 | 1.617 |

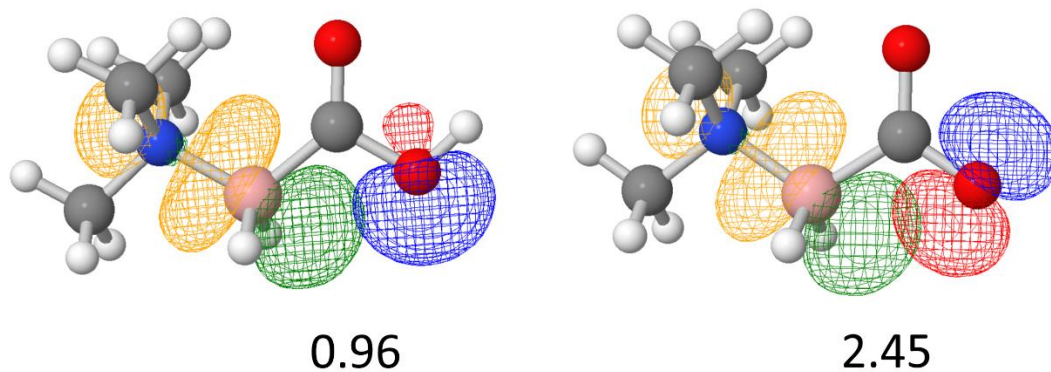

**Figure S3.** Secondary orbital donor-acceptor interactions in trimethylamine carboxyborane (l) and carboxyborane anion (r). Red/blue, donor; green/yellow, acceptor. E(2) interaction energy in kcal mol<sup>-1</sup>. Orbital surfaces shown at the 0.065 e Bohr<sup>-3</sup> level.

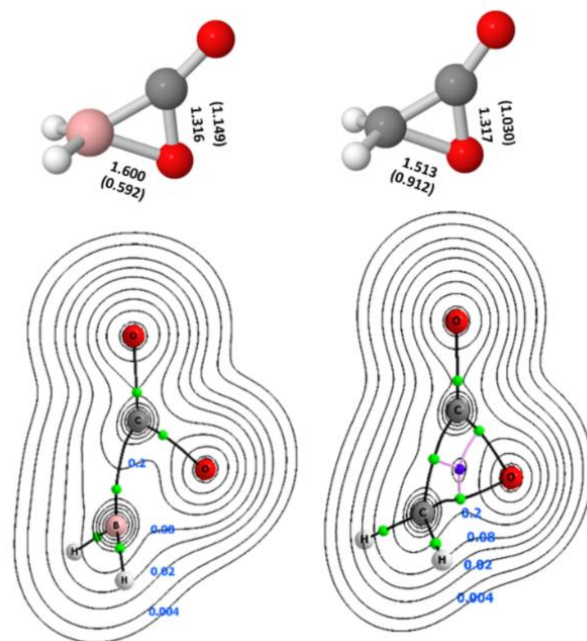

**Figure S4.** (upper) Optimized geometries of BH<sub>2</sub>COO<sup>-</sup> (l) and (left) and α-acetolactone (right). Distance, Å, Wiberg bond index in parantheses. (lower) Atoms-in-molecules analysis AIM analysis. Critical bond paths, black; bond critical points; green; ring critical paths, pink; and ring critical point, purple. Contours show electron density in the plane of the 3-membered ring (e Bohr<sup>-3</sup>).

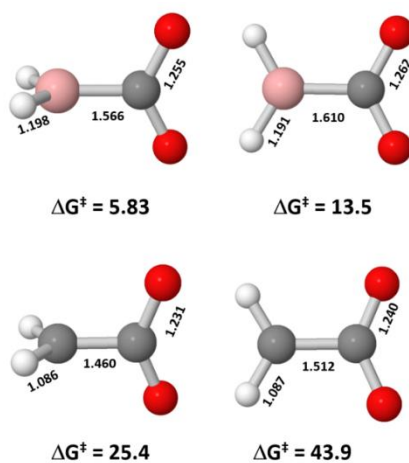

|                           | BH <sub>2</sub> COO <sup>-</sup>                     |             | CH <sub>2</sub> COO |             |
|---------------------------|------------------------------------------------------|-------------|---------------------|-------------|
|                           | perp                                                 | planar      | perp                | planar      |
|                           | PCM/M06-2X/6-311++G(2d,p)                            |             |                     |             |
| E <sub>elect</sub> (a.u.) | -214.7212004                                         | -214.710396 | -227.743893         | -227.719837 |
| ZPE                       | 0.031304                                             | 0.031600    | 0.035865            | 0.035094    |
| Internal Energy           | -214.686031                                          | -214.675103 | -227.704407         | -227.681022 |
| Enthalpy                  | -214.685087                                          | -214.674158 | -227.703463         | -227.680078 |
| Gibbs Free Energy         | -214.715265                                          | -214.704022 | -227.733127         | -227.709948 |
|                           | PCM/CCSD(T)/6-311++G(2,p)//PCM/M06-2X/6-311++G(2d,p) |             |                     |             |
| E <sub>elect</sub> (a.u.) | -214.3269261                                         | -214.315158 | -227.3468663        | -227.316433 |
| Internal Energy           | -214.2917567                                         | -214.279865 | -227.3073803        | -227.277618 |
| Enthalpy                  | -214.2908127                                         | -214.278920 | -227.3064363        | -227.276674 |
| Gibbs Free Energy         | -214.3209907                                         | -214.308784 | -227.3361003        | -227.306544 |

**Figure S5.** Transition states for internal rotation and inversion. Top, BH<sub>2</sub>COO<sup>-</sup>; bottom, CH<sub>2</sub>COO; left, COO invert; right, COO twist. PCM/CCSD(T)/6-311++G(2d,p)//PCM/M06-2X/6-311++G(2d,p). Bond distances in Å; Free energies in kcal mol<sup>-1</sup> at 298.15 K.

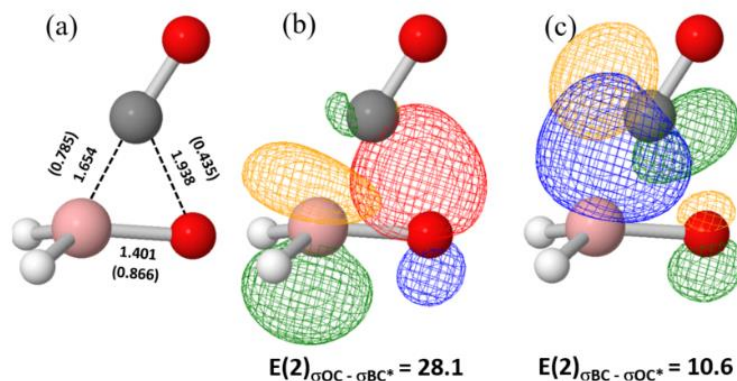

**Figure S6.** (a) Transition state for chelotropic extrusion of CO. distance, Å; Wiberg bond order in parentheses. (b,c) Natural bond orbital donor-acceptor interactions with second-order stabilization energy in kcal mol<sup>-1</sup>. Red/blue, donor; green/orange, acceptor. Isosurface, 0.1 e Bohr<sup>-3</sup>. M06-2X/6-311++G(2d,p)/PCM and NBO7.

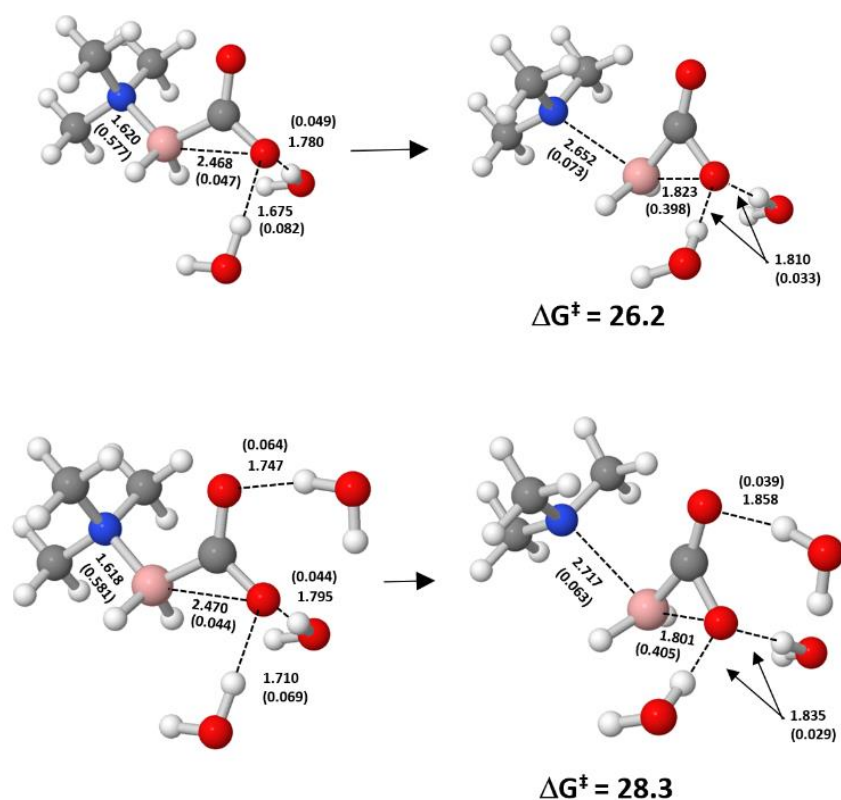

**Figure S7.** Two- and three-water-TMA-BH<sub>2</sub>COO<sup>-</sup> complexes and the corresponding S<sub>N</sub>i transition state (C<sub>s</sub> symmetry). Distances in Å. Wiberg bond order in parentheses. Gibbs free energy of activation in kcal mol<sup>-1</sup> at 298.15 K

**Figure S8** Plots of activation barriers and  $S_{Ni}$  reaction free energy VS. model chemistry

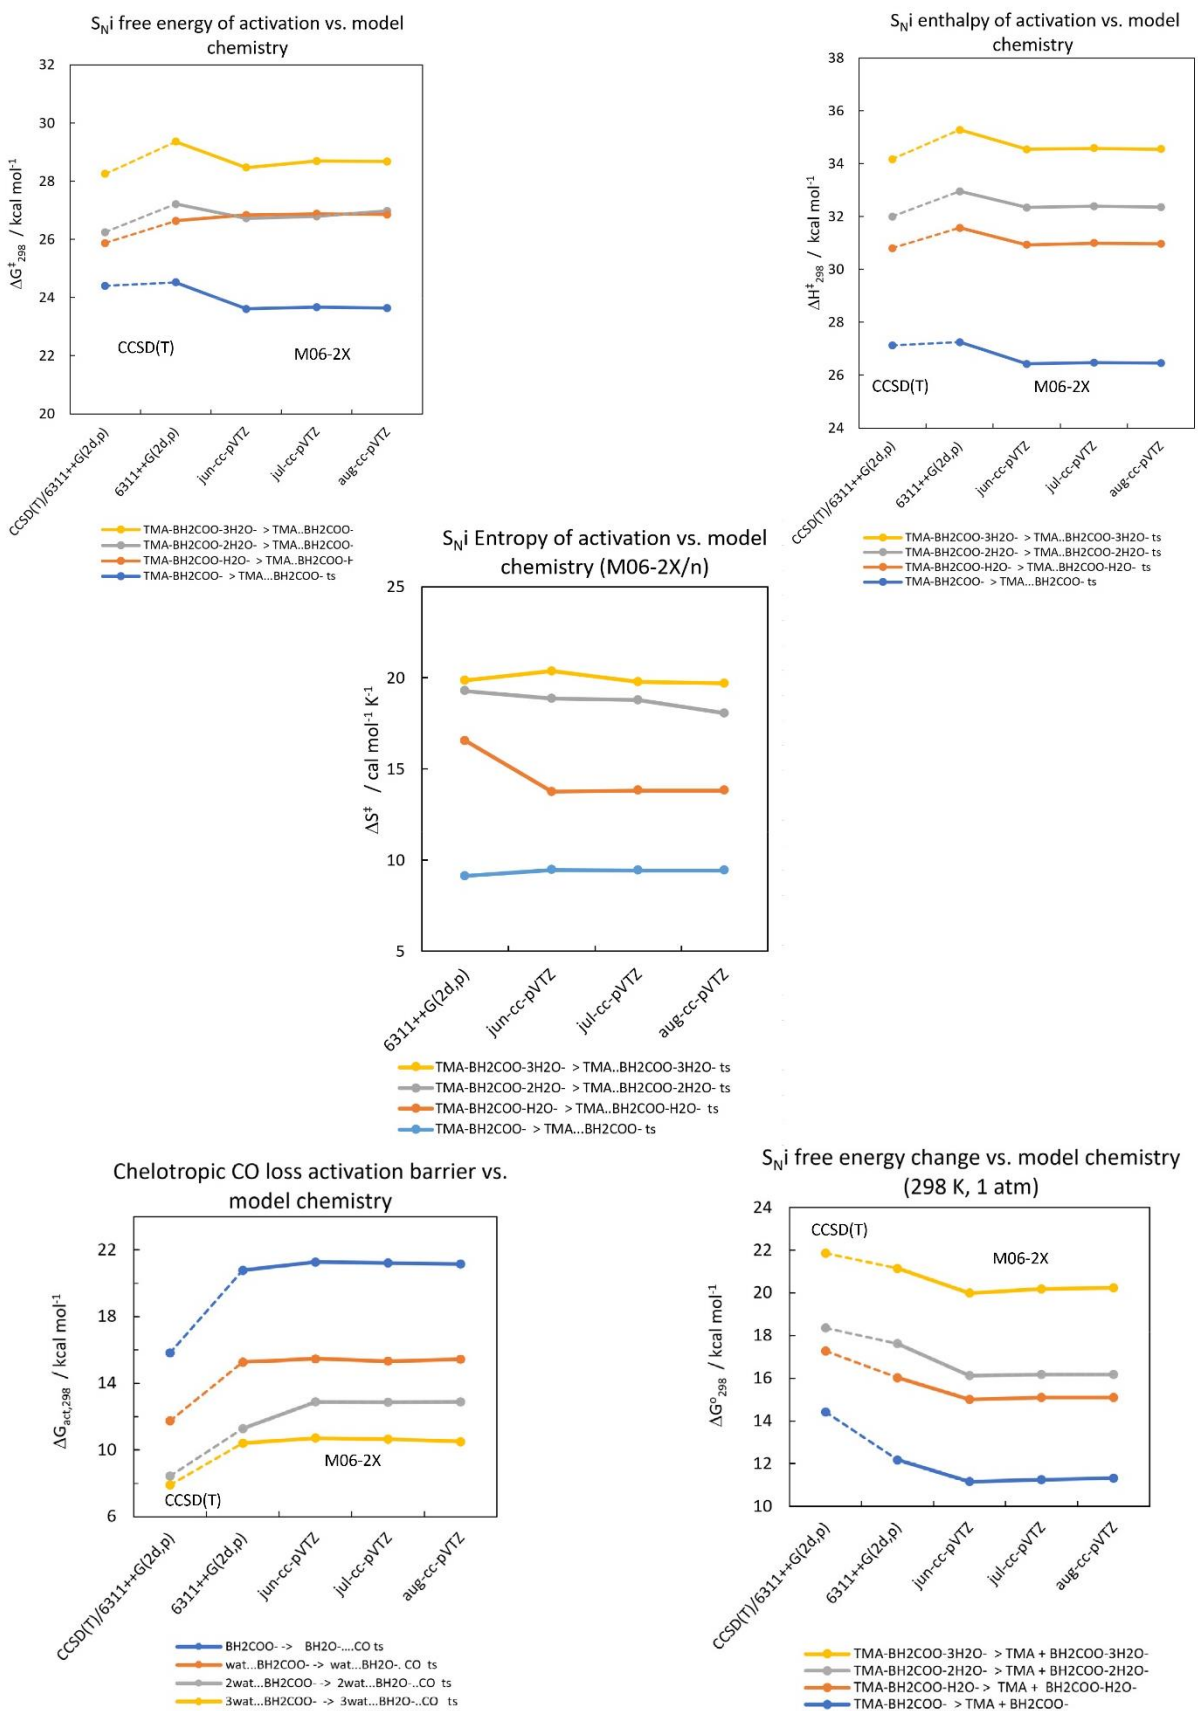

**Figure S9.** Geometries and energy changes for chelotropic reaction of  $\text{BH}_2\text{COO}^-$ ,  $\alpha$ -acetolactone, and trans-2,3-di-*t*-butylcyclopropane

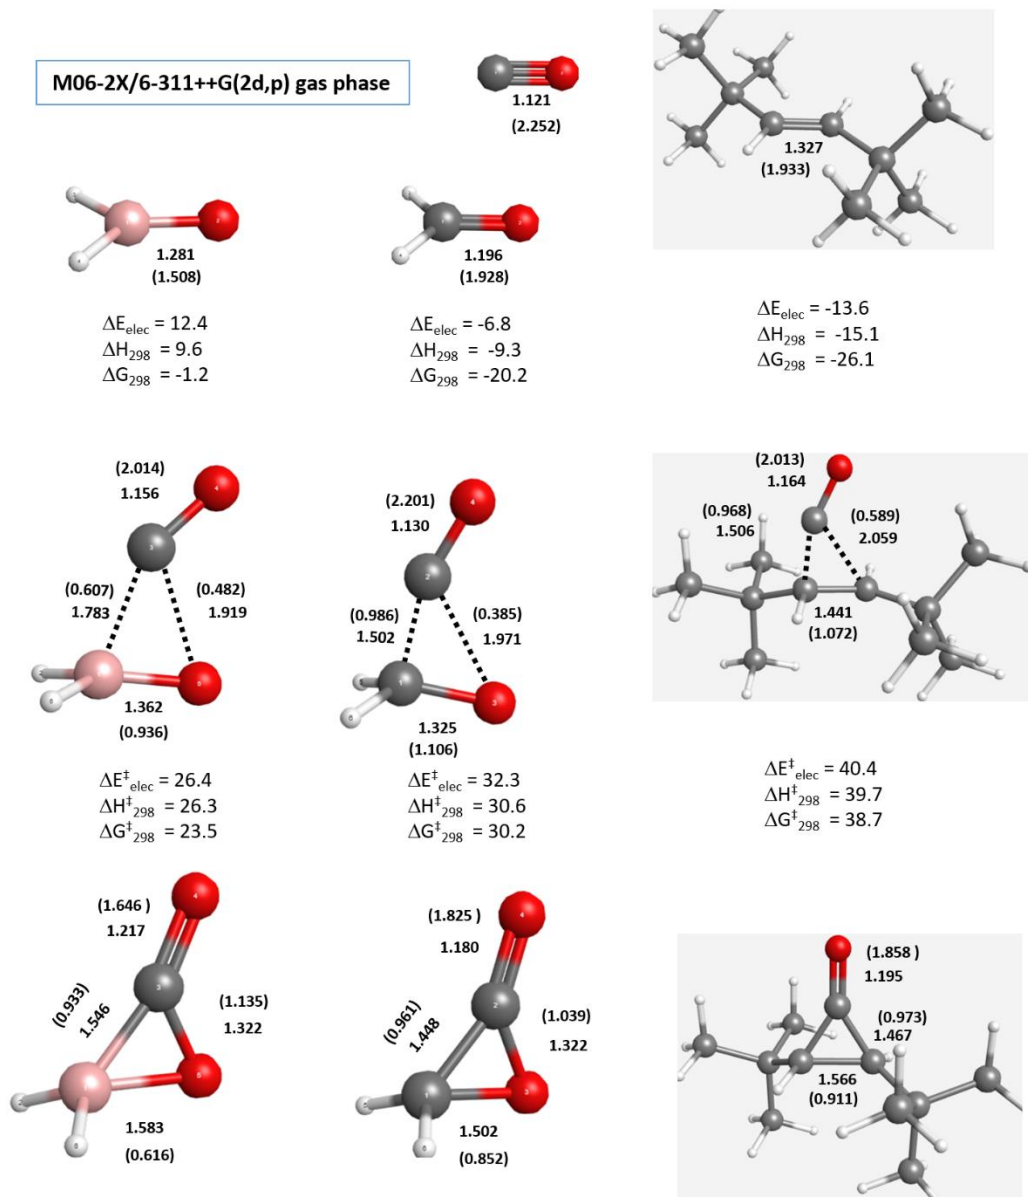



**Figure S10.** Mulliken atomic charge analysis of TMA-BH<sub>2</sub>COO<sup>-</sup>, 2-water complex, and related transition states. The partial charges are displayed using the WebMO graphical interface. The analysis shows that the partial charges on the S<sub>N</sub>i reacting atoms (O,B,N) decrease going from reactant to transition state, i.e. the transition state is less polar than the reactant.

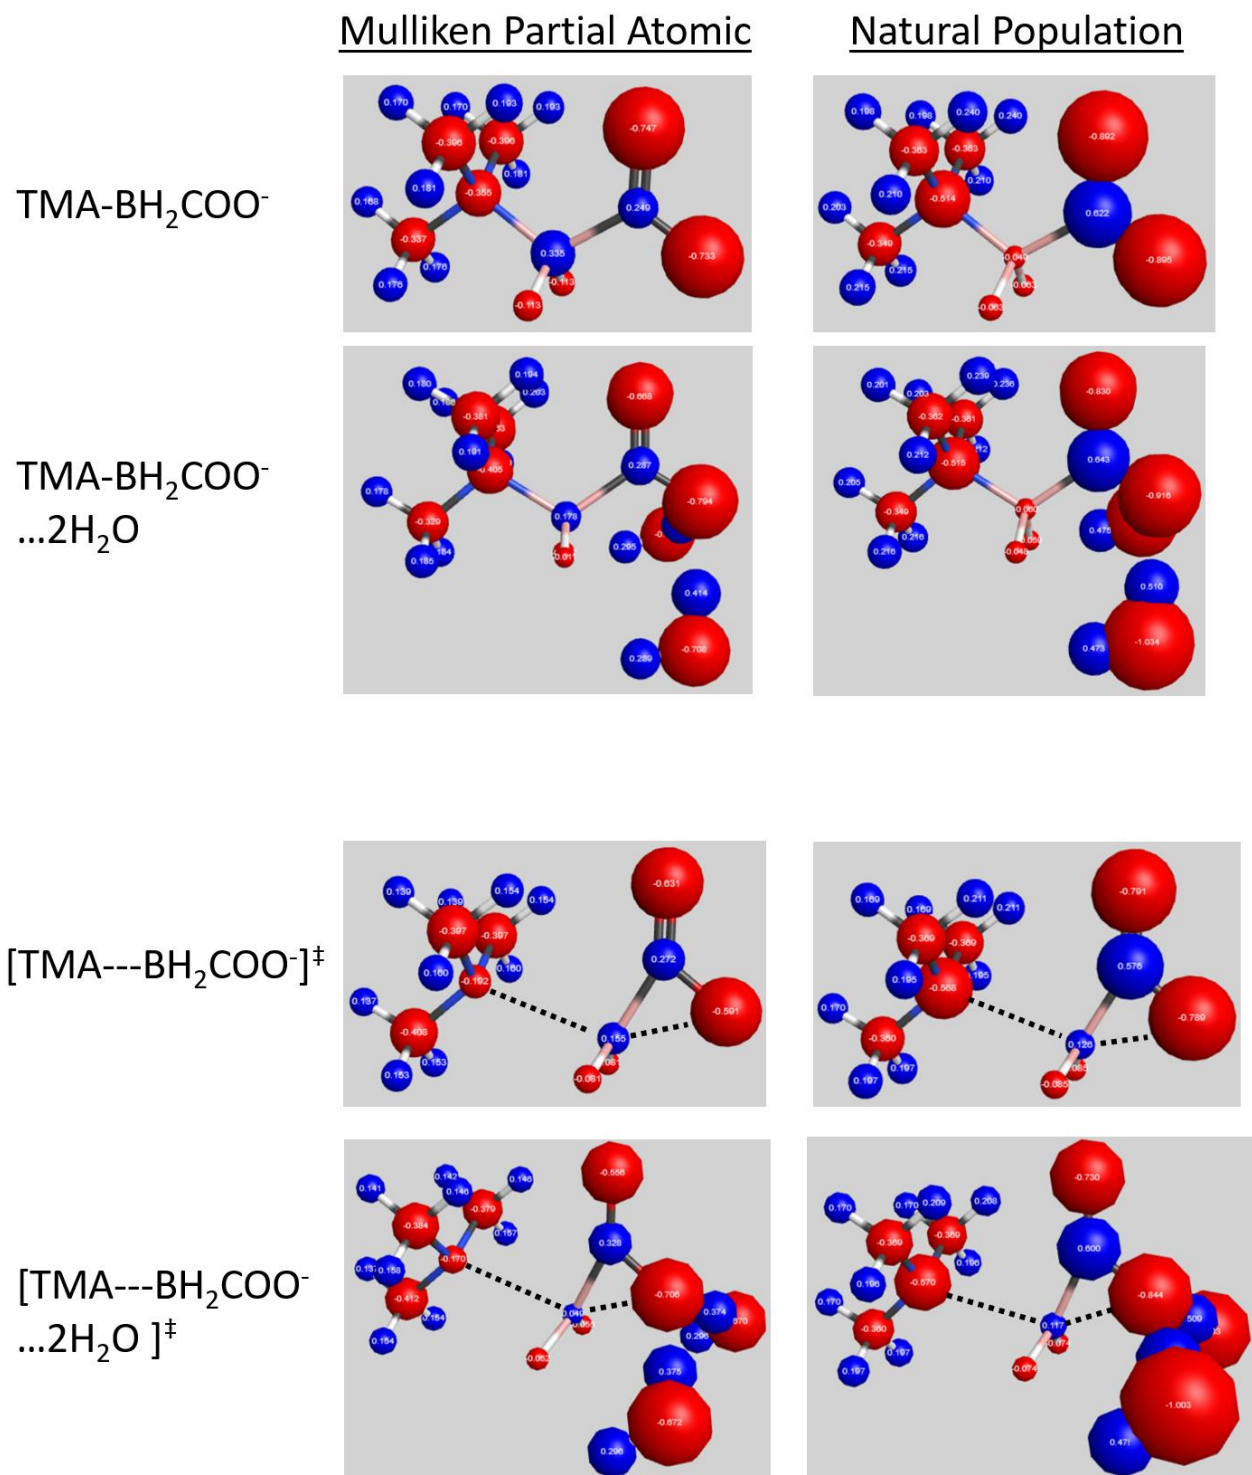

**Table S1.** Transition state imaginary frequencies (cm<sup>-1</sup>)

|                                                                       | M06-2X/6-311++G(2d,p) | M06-2X/jun-cc-pVTZ/PCM-H <sub>2</sub> O | M06-2X/jul-cc-pVTZ/PCM-H <sub>2</sub> O | M06-2X/aug-cc-pVTZ/PCM-H <sub>2</sub> O | M06-2X/6-311++G(2d,p)/PCM-H <sub>2</sub> O |
|-----------------------------------------------------------------------|-----------------------|-----------------------------------------|-----------------------------------------|-----------------------------------------|--------------------------------------------|
| TMA...BH <sub>2</sub> COO <sup>-</sup>                                | 361.2998 <i>i</i>     | 306.9278 <i>i</i>                       | 307.5277 <i>i</i>                       | 307.2053 <i>i</i>                       | 314.6652 <i>i</i>                          |
| TMA...BH <sub>2</sub> COO(H <sub>2</sub> O) <sup>-</sup>              | 364.1976 <i>i</i>     | 278.0357 <i>i</i>                       | 278.6883 <i>i</i>                       | 278.1473 <i>i</i>                       | 289.6412 <i>i</i>                          |
| TMA...BH <sub>2</sub> COO(H <sub>2</sub> O) <sub>2</sub> <sup>-</sup> | 359.6883 <i>i</i>     | 241.0862 <i>i</i>                       | 241.0247 <i>i</i>                       | 238.9556 <i>i</i>                       | 238.9854 <i>i</i>                          |
| TMA...BH <sub>2</sub> COO(H <sub>2</sub> O) <sub>3</sub> <sup>-</sup> | 301.1473 <i>i</i>     | 181.7069 <i>i</i>                       | 184.7966 <i>i</i>                       | 184.5482 <i>i</i>                       | 192.9984 <i>i</i>                          |
| CO...BH <sub>2</sub> O <sup>-</sup>                                   | 491.9006 <i>i</i>     | 382.4063 <i>i</i>                       | 382.3870 <i>i</i>                       | 382.1343 <i>i</i>                       | 406.4770 <i>i</i>                          |
| CO...BH <sub>2</sub> O(H <sub>2</sub> O) <sup>-</sup>                 | 402.5600 <i>i</i>     | 380.1186 <i>i</i>                       | 380.2659 <i>i</i>                       | 380.2013 <i>i</i>                       | 402.7236 <i>i</i>                          |
| CO...BH <sub>2</sub> O(H <sub>2</sub> O) <sub>2</sub> <sup>-</sup>    | 364.3893 <i>i</i>     | 391.7935 <i>i</i>                       | 391.3612 <i>i</i>                       | 391.6203 <i>i</i>                       | 406.2518 <i>i</i>                          |
| CO...BH <sub>2</sub> O(H <sub>2</sub> O) <sub>3</sub> <sup>-</sup>    | 358.8720 <i>i</i>     | 407.0097 <i>i</i>                       | 406.9429 <i>i</i>                       | 407.5284 <i>i</i>                       | 413.4166 <i>i</i>                          |

**Table S2.** Energies of reactants, intermediates, transition states, and products

|                                                                            | Gas phase<br>G <sub>298</sub> | M06-2X/6-311++G(2d,p) <sup>a</sup><br>PCM-H <sub>2</sub> O |                  |                |                  | CCSD(T) <sup>b</sup><br>PCM-H <sub>2</sub> O |                  | ΔG <sub>sol</sub> <sup>c</sup> |
|----------------------------------------------------------------------------|-------------------------------|------------------------------------------------------------|------------------|----------------|------------------|----------------------------------------------|------------------|--------------------------------|
|                                                                            |                               | E <sub>elect</sub>                                         | H <sub>298</sub> | S <sup>d</sup> | G <sub>298</sub> | G <sub>298</sub>                             | G <sub>298</sub> |                                |
|                                                                            |                               |                                                            |                  |                |                  |                                              |                  |                                |
| T <sup>e</sup>                                                             | -174.337916                   | -174.43519                                                 | -174.307831      | 70.397         | -174.34128       | -173.986054                                  | -2.111           |                                |
| T-BH <sub>2</sub> COOH                                                     | -389.547108                   | -389.700225                                                | -389.516732      | 92.711         | -389.560782      | -388.810165                                  | -8.581           |                                |
| T-BH <sub>2</sub> COO <sup>-</sup>                                         | -388.972556                   | -389.216801                                                | -389.046886      | 91.463         | -389.090383      | -388.339320                                  | -73.938          |                                |
| T-BH <sub>2</sub> COO(H <sub>2</sub> O) <sup>-</sup>                       | -465.405976                   | -465.664093                                                | -465.466918      | 105.703        | -465.517141      | -464.643924                                  | -69.757          |                                |
| T-BH <sub>2</sub> COO(H <sub>2</sub> O) <sub>2</sub> <sup>-</sup>          | -541.834658                   | -542.106070                                                | -541.881160      | 123.462        | -541.939821      | -540.945731                                  | -65.991          |                                |
| T-BH <sub>2</sub> COO(H <sub>2</sub> O) <sub>3</sub> <sup>-</sup>          | -618.264569                   | -618.550644                                                | -618.297943      | 141.212        | -618.365038      | -617.249554                                  | -63.045          |                                |
| T...BH <sub>2</sub> COO <sup>-</sup> (t.s.)                                | -388.954776                   | -389.169540                                                | -389.003471      | 100.682        | -389.051308      | -388.300443                                  | -60.575          |                                |
| T...BH <sub>2</sub> COO(H <sub>2</sub> O) <sup>-</sup> (t.s.)              | -465.382584                   | -465.609793                                                | -465.416604      | 122.262        | -465.474694      | -464.602706                                  | -57.800          |                                |
| T...BH <sub>2</sub> COO(H <sub>2</sub> O) <sub>2</sub> <sup>-</sup> (t.s.) | -541.806173                   | -542.049301                                                | -541.828637      | 142.750        | -541.896462      | -540.903906                                  | -56.657          |                                |
| T...BH <sub>2</sub> COO(H <sub>2</sub> O) <sub>3</sub> <sup>-</sup> (t.s.) | -618.233118                   | -618.490175                                                | -618.241723      | 161.070        | -618.318253      | -617.204535                                  | -53.423          |                                |
| BH <sub>2</sub> COO <sup>-</sup>                                           | -214.639092                   | -214.736988                                                | -214.699326      | 63.922         | -214.729698      | -214.330286                                  | -56.856          |                                |
| BH <sub>2</sub> COO(H <sub>2</sub> O) <sup>-</sup>                         | -291.063575                   | -291.175327                                                | -291.110270      | 84.300         | -291.150323      | -290.630343                                  | -54.435          |                                |
| BH <sub>2</sub> COO(H <sub>2</sub> O) <sub>2</sub> <sup>-</sup>            | -367.486261                   | -367.613239                                                | -367.520645      | 104.848        | -367.570461      | -366.930427                                  | -52.836          |                                |
| BH <sub>2</sub> COO(H <sub>2</sub> O) <sub>3</sub> <sup>-</sup>            | -443.907906                   | -444.056543                                                | -443.935518      | 114.803        | -443.990065      | -443.228671                                  | -51.556          |                                |
| CO...BH <sub>2</sub> O <sup>-</sup> (t.s.)                                 | -214.601685                   | -214.700108                                                | -214.665479      | 65.475         | -214.696588      | -214.305080                                  | -59.553          |                                |
| CO...BH <sub>2</sub> O(H <sub>2</sub> O) <sup>-</sup> (t.s.)               | -291.035233                   | -291.148066                                                | -291.086301      | 83.522         | -291.125986      | -290.611638                                  | -56.948          |                                |
| CO...BH <sub>2</sub> O(H <sub>2</sub> O) <sub>2</sub> <sup>-</sup> (t.s.)  | -367.464462                   | -367.593510                                                | -367.504156      | 101.725        | -367.552489      | -366.916971                                  | -55.238          |                                |
| CO...BH <sub>2</sub> O(H <sub>2</sub> O) <sub>3</sub> <sup>-</sup> (t.s.)  | -443.890899                   | -444.038715                                                | -443.921067      | 110.324        | -443.973486      | -443.216098                                  | -51.824          |                                |
| BH <sub>2</sub> O <sup>-</sup>                                             | -101.314386                   | -101.418647                                                | -101.393838      | 52.741         | -101.418897      | -101.228573                                  | -65.582          |                                |
| BH <sub>2</sub> O(H <sub>2</sub> O) <sup>-</sup>                           | -177.751913                   | -177.866293                                                | -177.814253      | 71.884         | -177.848407      | -177.535383                                  | -60.551          |                                |
| BH <sub>2</sub> O(H <sub>2</sub> O) <sub>2</sub> <sup>-</sup>              | -254.183762                   | -254.311506                                                | -254.231871      | 90.781         | -254.275004      | -253.840506                                  | -57.255          |                                |
| BH <sub>2</sub> O(H <sub>2</sub> O) <sub>3</sub> <sup>-</sup>              | -330.608428                   | -330.753226                                                | -330.645307      | 106.506        | -330.695911      | -330.139668                                  | -54.896          |                                |
| CO                                                                         | -113.326619                   | -113.313299                                                | -113.304817      | 47.176         | -113.327232      | -113.133458                                  | -0.385           |                                |
| H <sub>2</sub> O                                                           | -76.418127                    | -76.429755                                                 | -76.404485       | 45.074         | -76.425909       | -76.305603                                   | -4.883           |                                |

<sup>a</sup>M06-2X energies (a.u.): H<sub>298</sub> = E<sub>elect</sub> + ZPVE + thermal-correction-to-298 + RT, where T is temperature in K, and R = gas constant. The thermal correction = E<sub>tr</sub> + E<sub>vib</sub> + E<sub>rot</sub> + E<sub>elec</sub>, where E<sub>tr</sub> = 3RT/2, E<sub>rot</sub> = 3RT/2, E<sub>elec</sub> ≈ 0.000, E<sub>vib</sub> = RΣθ<sub>i</sub>[0.5 + (exp(θ<sub>i</sub>/T)-1)] with θ<sub>i</sub> = vibrational temperature of the *i*th vibration; G<sub>298</sub> = H<sub>298</sub> - TS<sub>tot</sub>. <sup>b</sup>CCSD(T) energies (a.u.): H<sub>298,CCSD(T)</sub> = E<sub>elect,CCSD(T)</sub> + (ZPVE + thermal-correction)<sub>M06-2X</sub> + RT; and G<sub>298,CCSD(T)</sub> = H<sub>298,CCSD(T)</sub> - TS<sub>tot,M06-2X</sub>. <sup>c</sup>Gibbs free energy of solvation (kcal mol<sup>-1</sup>) = ΔG<sub>sol</sub> = G<sub>298</sub>(PCM-H<sub>2</sub>O) - G<sub>298</sub>(gas phase). <sup>d</sup>cal/mol-K <sup>e</sup>T = TMA

**Table S3.** Cartesian coordinates of all compounds in Tables 1 and S2. M06-2X/6-311++G(2d,p)

|                   | gas                                                                                                                                                                                                                                                                                                                                                                                                                                                                                                                                                                                                                                                                                    | Pcm ("scrif=solvent=water")                                                                                                                                                                                                                                                                                                                                                                                                                                                                                                                                                                                                                                                                  |
|-------------------|----------------------------------------------------------------------------------------------------------------------------------------------------------------------------------------------------------------------------------------------------------------------------------------------------------------------------------------------------------------------------------------------------------------------------------------------------------------------------------------------------------------------------------------------------------------------------------------------------------------------------------------------------------------------------------------|----------------------------------------------------------------------------------------------------------------------------------------------------------------------------------------------------------------------------------------------------------------------------------------------------------------------------------------------------------------------------------------------------------------------------------------------------------------------------------------------------------------------------------------------------------------------------------------------------------------------------------------------------------------------------------------------|
| TMA               | 6 0.000000 1.376971 -0.063448<br>7 0.000000 0.000000 0.392918<br>6 -1.192492 -0.688486 -0.063448<br>1 -1.195912 -1.711805 0.314459<br>1 -2.080423 -0.179788 0.314459<br>1 -1.256325 -0.725340 -1.165040<br>6 1.192492 -0.688486 -0.063448<br>1 1.195912 -1.711805 0.314459<br>1 1.256325 -0.725340 -1.165040<br>1 2.080423 -0.179788 0.314459<br>1 0.884511 1.891593 0.314459<br>1 0.000000 1.450679 -1.165040<br>1 -0.884511 1.891593 0.314459                                                                                                                                                                                                                                        | 6 0.000028 -0.000506 0.000000<br>7 0.467870 -1.377686 0.000000<br>6 0.000001 -2.066257 1.192677<br>1 0.371420 -3.091781 1.197827<br>1 0.371400 -1.557904 2.083348<br>1 -1.101192 -2.096029 1.244375<br>6 0.000001 -2.066257 -1.192677<br>1 0.371420 -3.091781 -1.197827<br>1 -1.101192 -2.096029 -1.244375<br>1 0.371400 -1.557904 -2.083348<br>1 0.371528 0.516618 -0.885579<br>1 -1.101141 0.059163 0.000000<br>1 0.371528 0.516618 0.885579                                                                                                                                                                                                                                               |
| TMA-BH2COOH       | 7 1.084235 0.065305 -0.000058<br>5 -0.255958 0.980372 -0.000123<br>6 -1.569422 0.048321 0.000050<br>8 -1.642389 -1.166343 0.000185<br>8 -2.712095 0.772377 0.000071<br>1 -3.442069 0.135133 0.000185<br>1 -0.214127 1.647492 1.002045<br>1 -0.214211 1.647225 -1.002471<br>6 1.148567 -0.790088 1.210929<br>1 2.088704 -1.345575 1.214852<br>1 1.092242 -0.147634 2.087539<br>1 0.303317 -1.472760 1.197202<br>6 1.148445 -0.790426 -1.210812<br>1 2.088551 -1.345968 -1.214639<br>1 0.303160 -1.473050 -1.196841<br>1 1.092104 -0.148212 -2.087596<br>6 2.248348 0.979339 -0.000242<br>1 3.172275 0.397452 -0.000245<br>1 2.200161 1.607778 -0.886823<br>1 2.200290 1.607971 0.886209 | 7 -1.088726 0.065926 0.000005<br>5 0.251947 0.951777 -0.000035<br>6 1.579796 0.036562 -0.000020<br>8 1.691270 -1.175287 -0.000017<br>8 2.707322 0.793383 0.000038<br>1 3.464948 0.187515 0.000022<br>1 0.234346 1.627219 -0.999851<br>1 0.234447 1.627213 0.999810<br>6 -1.170258 -0.790366 -1.211894<br>1 -2.114052 -1.336435 -1.205279<br>1 -1.118557 -0.150999 -2.090639<br>1 -0.334551 -1.484089 -1.205370<br>6 -1.170086 -0.790711 1.211674<br>1 -2.114238 -1.336156 1.205421<br>1 -0.334823 -1.484958 1.204476<br>1 -1.117462 -0.151658 2.090596<br>6 -2.248793 0.992584 0.000228<br>1 -3.173257 0.414536 -0.000090<br>1 -2.199170 1.616781 0.889442<br>1 -2.198989 1.617479 -0.888485 |
| TMA-BH2COO-       | 7 -0.013610 0.005101 -0.000028<br>5 1.377890 0.935198 0.000217<br>6 2.716066 -0.003785 0.000151<br>8 2.601689 -1.277515 -0.000059<br>8 3.800704 0.617549 0.000318<br>1 1.254459 1.604276 -1.009851<br>1 1.254325 1.603944 1.010488<br>6 -1.183481 0.891626 0.000038<br>1 -2.107411 0.301840 -0.000121<br>1 -1.142588 1.523902 0.885445<br>1 -1.142469 1.524191 -0.885157<br>6 -0.038728 -0.848617 1.206322<br>1 -0.952150 -1.454385 1.212741<br>1 0.861260 -1.463955 1.172486<br>1 -0.014728 -0.198618 2.080363<br>6 -0.038567 -0.848224 -1.206660<br>1 -0.951987 -1.453991 -1.213397<br>1 -0.014453 -0.197941 -2.080485<br>1 0.861418 -1.463571 -1.172904                             | 7 1.041474 0.067591 -0.000008<br>5 -0.319010 0.964821 -0.000033<br>6 -1.697600 0.093918 0.000006<br>8 -1.699923 -1.175590 0.000047<br>8 -2.766696 0.778097 -0.000009<br>1 -0.242241 1.648369 1.002188<br>1 -0.242252 1.648297 -1.002305<br>6 2.212813 0.972196 -0.000048<br>1 3.132109 0.383761 -0.000030<br>1 2.173390 1.598925 -0.888316<br>1 2.173399 1.598994 0.888170<br>6 1.104578 -0.789510 -1.208295<br>1 2.031389 -1.366243 -1.200166<br>1 0.238854 -1.445578 -1.197469<br>1 1.078226 -0.147721 -2.087097<br>6 1.104591 -0.789420 1.208342<br>1 2.031399 -1.366156 1.200245<br>1 1.078252 -0.147565 2.087096<br>1 0.238865 -1.445486 1.197575                                       |
| TMA-BH2COO-...H2O | 7 1.386733 0.335311 0.000001<br>5 -0.263870 0.496942 0.000002<br>6 -1.004586 -0.959044 0.000001<br>8 -0.317716 -2.024048 -0.000010<br>8 -2.266252 -0.935965 0.000010<br>1 -0.485298 1.141558 1.007858<br>1 -0.485300 1.141560 -1.007853<br>6 1.995155 1.673651 0.000007<br>1 3.087293 1.591273 0.000004<br>1 1.659460 2.210362 -0.885514<br>1 1.659463 2.210353 0.885533<br>6 1.820366 -0.401276 -1.207708<br>1 2.911923 -0.491152 -1.212250<br>1 1.332604 -1.375025 -1.178226<br>1 1.487263 0.156830 -2.081782<br>6 1.820366 -0.401286 -1.207703<br>1 2.911923 -0.491158 1.212247<br>1 1.487258 0.156810 2.081781                                                                     | 7 -1.386150 0.315429 0.000196<br>5 0.230511 0.461777 -0.000112<br>6 1.024472 -0.961513 -0.000213<br>8 0.435848 -2.074392 -0.000155<br>8 2.303182 -0.876916 -0.000367<br>1 0.494881 1.096743 -1.001259<br>1 0.495245 1.096804 1.000899<br>6 -1.986313 1.669499 0.000298<br>1 -3.074608 1.588397 0.000502<br>1 -1.653369 2.201717 0.888621<br>1 -1.653702 2.201702 -0.888158<br>6 -1.850628 -0.407435 1.209836<br>1 -2.940212 -0.469039 1.201797<br>1 -1.407202 -1.398934 1.200703<br>1 -1.519567 0.143749 2.088078<br>6 -1.851106 -0.407457 -1.209248<br>1 -2.940688 -0.469055 -1.200780<br>1 -1.520387 0.143707 -2.087631                                                                    |

|                   |                                                                                                                                                                                                                                                                                                                                                                                                                                                                                                                                                                                                                                                                                                                                                                                                                                                                                                                                                                        |                                                                                                                                                                                                                                                                                                                                                                                                                                                                                                                                                                                                                                                                                                                                                                                                                                                                                                                                                                  |
|-------------------|------------------------------------------------------------------------------------------------------------------------------------------------------------------------------------------------------------------------------------------------------------------------------------------------------------------------------------------------------------------------------------------------------------------------------------------------------------------------------------------------------------------------------------------------------------------------------------------------------------------------------------------------------------------------------------------------------------------------------------------------------------------------------------------------------------------------------------------------------------------------------------------------------------------------------------------------------------------------|------------------------------------------------------------------------------------------------------------------------------------------------------------------------------------------------------------------------------------------------------------------------------------------------------------------------------------------------------------------------------------------------------------------------------------------------------------------------------------------------------------------------------------------------------------------------------------------------------------------------------------------------------------------------------------------------------------------------------------------------------------------------------------------------------------------------------------------------------------------------------------------------------------------------------------------------------------------|
|                   | 1 1.332608 -1.375037 1.178210<br>8 -3.356681 1.493743 -0.000002<br>1 -2.537724 1.995781 -0.000038<br>1 -3.011877 0.553852 0.000007                                                                                                                                                                                                                                                                                                                                                                                                                                                                                                                                                                                                                                                                                                                                                                                                                                     | 1 -1.407684 -1.398958 -1.200271<br>8 3.291649 1.535922 -0.000329<br>1 2.514501 2.102481 -0.000206<br>1 2.899311 0.608323 -0.000338                                                                                                                                                                                                                                                                                                                                                                                                                                                                                                                                                                                                                                                                                                                                                                                                                               |
| TMA-BH2COO-..2H2O | 7 -1.893489 0.275829 0.152825<br>5 -0.312048 0.558509 -0.234562<br>6 0.503729 -0.836436 -0.450212<br>8 -0.072147 -1.949700 -0.341030<br>8 1.739880 -0.712370 -0.727348<br>1 -0.370559 1.231287 -1.243911<br>1 0.105429 1.196805 0.713362<br>6 -2.570878 1.567779 0.343652<br>1 -3.623071 1.406275 0.599190<br>1 -2.069909 2.110451 1.143167<br>1 -2.492034 2.143251 -0.576862<br>6 -1.976079 -0.509584 1.405065<br>1 -3.026284 -0.669639 1.669651<br>1 -1.456796 -1.450449 1.230996<br>1 -1.472915 0.051941 2.190882<br>6 -2.557492 -0.468683 -0.940508<br>1 -3.609393 -0.634702 -0.686440<br>1 -2.481808 0.126146 -1.849731<br>1 -2.019314 -1.407335 -1.063321<br>8 2.704803 1.724213 -0.646510<br>1 1.955945 2.192823 -0.268263<br>1 2.326119 0.799712 -0.779227<br>8 3.845692 -0.323648 1.147530<br>1 3.744467 0.559241 0.765241<br>1 3.163270 -0.805574 0.649174                                                                                                   | 7 -1.697814 0.268463 0.150700<br>5 -0.128884 0.532772 -0.152903<br>6 0.666947 -0.779835 -0.694363<br>8 0.103547 -1.853821 -1.003507<br>8 1.948175 -0.639581 -0.787192<br>1 -0.099985 1.414901 -0.986336<br>1 0.344685 0.915899 0.898409<br>6 -2.294312 1.512467 0.690931<br>1 -3.355608 1.353542 0.888129<br>1 -1.780709 1.778327 1.612114<br>1 -2.166995 2.308744 -0.039253<br>6 -1.861384 -0.810869 1.155772<br>1 -2.920947 -0.942633 1.380507<br>1 -1.439943 -1.723584 0.744736<br>1 -1.325201 -0.524762 2.059018<br>6 -2.424258 -0.103493 -1.089222<br>1 -3.478842 -0.262921 -0.858428<br>1 -2.322683 0.710480 -1.804454<br>1 -1.974262 -1.008802 -1.485966<br>8 2.787398 1.893517 -0.724254<br>1 1.998266 2.382922 -0.473057<br>1 2.470996 0.951025 -0.752081<br>8 2.621830 -0.657029 1.887833<br>1 1.933618 -0.084791 2.240753<br>1 2.437170 -0.665756 0.923772                                                                                            |
| TMA-BH2COO-..3H2O | 7 0.081789 -0.055328 0.030483<br>5 -1.356491 0.693863 0.313427<br>6 -2.606848 -0.337394 0.175066<br>8 -2.415175 -1.568523 -0.036990<br>8 -3.768443 0.169705 0.293086<br>1 -1.249992 1.132218 1.441447<br>1 -1.400686 1.576697 -0.517083<br>6 1.156753 0.945743 0.136865<br>1 2.127488 0.472409 -0.039122<br>1 0.981337 1.727293 -0.599780<br>1 1.128514 1.384503 1.132539<br>6 0.093270 -0.637022 -1.331672<br>1 1.070005 -1.089372 -1.528609<br>1 -0.704104 -1.375194 -1.380624<br>1 -0.100597 0.163491 -2.043941<br>6 0.313532 -1.125403 1.027409<br>1 1.281444 -1.599491 0.837848<br>1 0.306800 -0.673254 2.018053<br>1 -0.504312 -1.837502 0.938934<br>8 -5.005677 -2.422393 0.399214<br>1 -4.103024 -2.426671 0.191532<br>1 -5.163415 -1.463194 0.468155<br>8 -3.732092 2.788963 0.864485<br>1 -2.780619 2.926669 0.855746<br>1 -3.797826 1.801244 0.755236<br>8 -4.519201 1.999160 -1.854839<br>1 -4.336638 2.610203 -1.127433<br>1 -4.349084 1.149669 -1.418065 | 7 2.058257 -0.073102 -0.024239<br>5 0.636778 0.613742 0.328463<br>6 -0.625492 -0.407117 0.258772<br>8 -0.501622 -1.654136 0.120937<br>8 -1.786545 0.137539 0.361969<br>1 0.750046 1.051198 1.454212<br>1 0.496446 1.512294 -0.475298<br>6 3.108682 0.972199 0.009236<br>1 4.078349 0.523063 -0.210300<br>1 2.873637 1.731392 -0.733212<br>1 3.123395 1.423229 0.999042<br>6 2.029445 -0.672321 -1.381841<br>1 3.011835 -1.082674 -1.620455<br>1 1.275677 -1.454188 -1.393585<br>1 1.770945 0.106735 -2.096872<br>6 2.405173 -1.122221 0.967433<br>1 3.374699 -1.554288 0.714812<br>1 2.451763 -0.662244 1.952550<br>1 1.628250 -1.880502 0.945295<br>8 -3.100952 -2.434849 0.174860<br>1 -2.125116 -2.298797 0.136404<br>1 -3.375879 -1.516276 0.283881<br>8 -1.718963 2.621332 1.416016<br>1 -0.779924 2.830235 1.422975<br>1 -1.746183 1.709710 1.033118<br>8 -1.993862 1.508244 -2.039367<br>1 -1.128696 1.924652 -2.097933<br>1 -1.962238 1.031425 -1.184198 |
| TMA---BH2COO- ts  | 7 -1.290352 0.071743 -0.000013<br>5 0.871706 1.194010 -0.000114<br>6 1.821312 -0.035273 -0.000017<br>8 1.793117 -1.277165 0.000041<br>8 2.827580 0.749634 -0.000041<br>1 0.606488 1.740100 -1.034609<br>1 0.606500 1.740225 1.034319<br>6 -2.451914 0.925384 -0.000243<br>1 -3.398323 0.351097 -0.000303<br>1 -2.435554 1.565349 0.884764<br>1 -2.435339 1.565192 -0.885361<br>6 -1.202010 -0.740821 1.196843<br>1 -2.063392 -1.428920 1.287292<br>1 -0.271745 -1.310664 1.157155<br>1 -1.178985 -0.090129 2.073663<br>6 -1.201949 -0.741372 -1.196495<br>1 -2.063188 -1.429702 -1.286518                                                                                                                                                                                                                                                                                                                                                                              | 7 1.353715 0.082318 0.000010<br>5 -0.977853 1.173748 -0.000106<br>6 -1.884994 -0.071555 -0.000011<br>8 -2.020664 -1.297217 0.000087<br>8 -2.810501 0.832027 -0.000098<br>1 -0.688037 1.692478 1.036939<br>1 -0.688008 1.692297 -1.037234<br>6 2.542760 0.912671 -0.000088<br>1 3.469276 0.314368 -0.000063<br>1 2.546219 1.550471 -0.885985<br>1 2.546264 1.550612 0.885708<br>6 1.282406 -0.739448 -1.194121<br>1 2.130330 -1.441416 -1.263420<br>1 0.350445 -1.306903 -1.179519<br>1 1.289779 -0.101330 -2.079806<br>6 1.282436 -0.739213 1.194304<br>1 2.130363 -1.441167 1.263724                                                                                                                                                                                                                                                                                                                                                                            |

|                         |                                                                                                                                                                                                                                                                                                                                                                                                                                                                                                                                                                                                                                                                                                                                                                                                                                                                        |                                                                                                                                                                                                                                                                                                                                                                                                                                                                                                                                                                                                                                                                                                                                                                                                                                                                          |
|-------------------------|------------------------------------------------------------------------------------------------------------------------------------------------------------------------------------------------------------------------------------------------------------------------------------------------------------------------------------------------------------------------------------------------------------------------------------------------------------------------------------------------------------------------------------------------------------------------------------------------------------------------------------------------------------------------------------------------------------------------------------------------------------------------------------------------------------------------------------------------------------------------|--------------------------------------------------------------------------------------------------------------------------------------------------------------------------------------------------------------------------------------------------------------------------------------------------------------------------------------------------------------------------------------------------------------------------------------------------------------------------------------------------------------------------------------------------------------------------------------------------------------------------------------------------------------------------------------------------------------------------------------------------------------------------------------------------------------------------------------------------------------------------|
|                         | 1 -1.179189 -0.091077 -2.073618<br>1 -0.271551 -1.310986 -1.156645                                                                                                                                                                                                                                                                                                                                                                                                                                                                                                                                                                                                                                                                                                                                                                                                     | 1 1.289823 -0.100924 2.079866<br>1 0.350478 -1.306675 1.179832                                                                                                                                                                                                                                                                                                                                                                                                                                                                                                                                                                                                                                                                                                                                                                                                           |
| TMA---BH2COO-. .H2O ts  | 7 -1.745408 -0.342141 -0.013262<br>5 0.607255 -0.365191 -0.708414<br>6 1.072804 0.982519 -0.106011<br>8 0.700357 1.975835 0.519325<br>8 2.245012 0.708104 -0.573055<br>1 0.783687 -1.376832 -0.086207<br>1 0.280566 -0.428892 -1.857754<br>6 -2.543140 -1.481646 -0.394464<br>1 -3.591893 -1.396613 -0.052351<br>1 -2.540987 -1.581819 -1.481891<br>1 -2.112382 -2.389133 0.033810<br>6 -2.212511 0.886805 -0.623417<br>1 -3.240720 1.137479 -0.303914<br>1 -1.531756 1.692711 -0.344141<br>1 -2.199648 0.777983 -1.709873<br>6 -1.629096 -0.206345 1.425145<br>1 -2.612677 -0.040269 1.901592<br>1 -1.187856 -1.115104 1.839583<br>1 -0.967238 0.633844 1.641466<br>8 3.755828 -1.454589 0.301440<br>1 2.985640 -2.024098 0.229871<br>1 3.378924 -0.591108 0.035512                                                                                                   | 7 -1.821140 -0.302530 -0.036090<br>5 0.644369 -0.245659 -0.881667<br>6 1.182926 0.965396 -0.097966<br>8 1.042639 1.896532 0.686477<br>8 2.268974 0.618120 -0.737582<br>1 0.766656 -1.339774 -0.416118<br>1 0.220739 -0.097815 -1.987507<br>6 -2.756729 -1.310003 -0.498945<br>1 -3.751860 -1.196814 -0.037142<br>1 -2.871082 -1.236922 -1.581810<br>1 -2.377288 -2.304174 -0.256592<br>6 -2.265337 1.032438 -0.393255<br>1 -3.230484 1.286223 0.076042<br>1 -1.514220 1.755559 -0.071991<br>1 -2.379465 1.104126 -1.476426<br>6 -1.602582 -0.405021 1.395217<br>1 -2.529335 -0.233526 1.967796<br>1 -1.225759 -1.400107 1.638679<br>1 -0.857978 0.333734 1.695635<br>8 3.655519 -1.520203 0.347828<br>1 3.004167 -2.227098 0.333557<br>1 3.185323 -0.749868 -0.027252                                                                                                    |
| TMA---BH2COO-. .2H2O ts | 7 -2.084216 -0.000039 -0.277629<br>5 0.356331 -0.000122 -0.593792<br>6 0.799770 0.000113 0.885227<br>8 0.446827 0.000292 2.055662<br>8 2.011106 0.000030 0.394592<br>1 0.277385 -1.035462 -1.191709<br>1 0.277362 1.035040 -1.192013<br>6 -2.889375 -0.000429 -1.475325<br>1 -3.973117 -0.000452 -1.255066<br>1 -2.657871 0.884424 -2.071760<br>1 -2.657734 -0.885579 -2.071266<br>6 -2.280674 1.197311 0.515774<br>1 -3.323689 1.288217 0.869032<br>1 -1.605444 1.163934 1.372083<br>1 -2.037134 2.074886 -0.086425<br>6 -2.280504 -1.197008 0.516396<br>1 -3.323528 -1.287916 0.869631<br>1 -2.036765 -2.074851 -0.085332<br>1 -1.605328 -1.163060 1.372721<br>8 2.874508 -2.443448 -0.687338<br>1 2.105937 -2.419334 -1.263064<br>1 2.756194 -1.622684 -0.172708<br>8 2.874354 2.443381 -0.687655<br>1 2.105777 2.419092 -1.263366<br>1 2.756156 1.622671 -0.172910 | 7 2.198723 0.016171 -0.291625<br>5 -0.436930 0.028331 -0.582377<br>6 -0.856090 -0.001276 0.897078<br>8 -0.638303 -0.022194 2.095764<br>8 -2.034001 0.000905 0.297248<br>1 -0.324896 1.078288 -1.139165<br>1 -0.311111 -0.999104 -1.176778<br>6 3.123990 0.052264 -1.409104<br>1 4.175724 0.025550 -1.078256<br>1 2.948083 -0.804835 -2.061357<br>1 2.969503 0.965147 -1.986738<br>6 2.345757 -1.211839 0.469037<br>1 3.354177 -1.308843 0.904784<br>1 1.610347 -1.224185 1.274974<br>1 2.166683 -2.070431 -0.180683<br>6 2.371432 1.173519 0.568257<br>1 3.381064 1.211785 1.010366<br>1 2.213295 2.086901 -0.008105<br>1 1.635036 1.135025 1.372429<br>8 -3.016911 2.414520 -0.682936<br>1 -2.355455 2.662163 -1.335110<br>1 -2.691254 1.572207 -0.314127<br>8 -2.935008 -2.442842 -0.689597<br>1 -2.251100 -2.675358 -1.323982<br>1 -2.643259 -1.588284 -0.320431      |
| TMA---BH2COO-. .3H2O ts | 7 0.102230 0.008676 0.092348<br>5 0.494547 -0.468765 2.600573<br>6 1.972609 -0.044623 2.658235<br>8 2.967426 0.378765 2.078982<br>8 1.848324 -0.367287 3.917861<br>1 -0.350337 0.337803 2.864447<br>1 0.207736 -1.611784 2.420465<br>6 -1.199012 -0.233156 -0.484152<br>1 -1.230930 0.000651 -1.564801<br>1 -1.470416 -1.282144 -0.350339<br>1 -1.945513 0.381383 0.023020<br>6 1.120584 -0.842471 -0.490697<br>1 1.234212 -0.662961 -1.575350<br>1 2.071103 -0.649856 0.008592<br>1 0.851257 -1.889167 -0.336346<br>6 0.479496 1.405996 0.015538<br>1 0.547538 1.756724 -1.030421<br>1 -0.262931 2.012385 0.538378<br>1 1.445697 1.538827 0.504235<br>8 4.766665 0.101742 4.278256<br>1 4.375293 0.303099 3.410750<br>1 3.983800 -0.220120 4.740641<br>8 0.108322 0.846935 5.729005<br>1 -0.619183 0.806272 5.101441<br>1 0.872959 0.615440 5.167550                  | 7 -2.653846 0.002842 -0.063305<br>5 -0.086216 0.123451 -0.944302<br>6 0.623666 -0.027620 0.409045<br>8 0.684180 -0.168891 1.622385<br>8 1.638660 0.073067 -0.428372<br>1 -0.331841 -0.851124 -1.586359<br>1 -0.340794 1.215092 -1.351352<br>6 -3.838417 0.108469 -0.895939<br>1 -4.767449 0.026187 -0.307177<br>1 -3.843254 1.070563 -1.410771<br>1 -3.835882 -0.685724 -1.644262<br>6 -2.607400 -1.077693 0.912305<br>1 -3.471988 1.050700 1.596581<br>1 -1.691827 0.991792 1.499376<br>1 -2.604774 2.040938 0.399045<br>6 -2.598150 -1.288527 0.598701<br>1 -3.461278 -1.446961 1.266796<br>1 -2.589643 -2.085049 -0.147454<br>1 -1.682078 -1.352223 1.187832<br>8 3.486894 -0.243064 1.874187<br>1 2.513559 -0.233526 1.940912<br>1 3.618398 -0.124285 0.926905<br>8 2.386446 -2.362188 -1.608052<br>1 1.599930 -2.611747 -2.101589<br>1 2.155012 -1.512872 -1.192200 |

|                      |                                                                                                                                                                                                                                                                                                                                                                                                                                                                                                                          |                                                                                                                                                                                                                                                                                                                                                                                                                                                                                                                         |
|----------------------|--------------------------------------------------------------------------------------------------------------------------------------------------------------------------------------------------------------------------------------------------------------------------------------------------------------------------------------------------------------------------------------------------------------------------------------------------------------------------------------------------------------------------|-------------------------------------------------------------------------------------------------------------------------------------------------------------------------------------------------------------------------------------------------------------------------------------------------------------------------------------------------------------------------------------------------------------------------------------------------------------------------------------------------------------------------|
|                      | 8 0.562389 -2.084703 5.921282<br>1 0.272637 -1.205150 6.197113<br>1 1.075121 -1.878287 5.126823                                                                                                                                                                                                                                                                                                                                                                                                                          | 8 2.369402 2.685556 -1.151936<br>1 1.598327 2.998494 -1.633520<br>1 2.140737 1.776671 -0.888486                                                                                                                                                                                                                                                                                                                                                                                                                         |
| BH2COO- cyclic       | 5 0.000072 -0.002007 -0.000013<br>1 -0.560708 -0.304478 1.028805<br>6 1.498987 0.377782 0.000007<br>8 2.715289 0.347177 0.000037<br>8 0.689938 1.422800 -0.000074<br>1 -0.560653 -0.304590 -1.028829                                                                                                                                                                                                                                                                                                                     | 5 -1.214188 -0.551911 0.000036<br>1 -1.764778 -0.841735 1.029181<br>6 0.280329 -0.168396 -0.000054<br>8 1.499491 -0.202800 0.000046<br>8 -0.509683 0.884565 -0.000059<br>1 -1.764722 -0.842456 -1.028937                                                                                                                                                                                                                                                                                                                |
| BH2COO-...H2O        | 5 -0.268864 1.313670 -0.201573<br>6 -1.124185 0.032066 -0.103697<br>8 -1.967382 -0.822474 -0.255500<br>8 -0.076233 0.038045 0.724470<br>1 0.552950 1.425028 -1.085379<br>1 -0.587585 2.326131 0.368836<br>8 2.551308 -0.489070 -0.126706<br>1 1.692491 -0.574396 0.323243<br>1 2.370030 0.250481 -0.714762                                                                                                                                                                                                               | 5 -0.435161 1.367836 -0.289428<br>6 -1.076386 -0.022913 -0.112818<br>8 -1.762973 -1.016874 -0.231910<br>8 -0.103502 0.200424 0.767025<br>1 0.416191 1.526720 -1.123418<br>1 -0.951253 2.341186 0.184884<br>8 2.488298 -0.485048 -0.084667<br>1 1.594376 -0.307590 0.256996<br>1 2.600222 0.149974 -0.797998                                                                                                                                                                                                             |
| BH2COO-...2H2O       | 5 0.000302 0.218945 1.297500<br>6 0.000253 1.256118 0.157134<br>8 0.000284 2.268558 -0.494651<br>8 0.000000 -0.023254 -0.276224<br>1 1.026672 -0.076696 1.859661<br>1 -1.025973 -0.076466 1.859957<br>8 2.493297 -1.383607 -0.313708<br>1 1.672481 -0.957485 -0.611889<br>1 2.466054 -1.197128 0.629321<br>8 -2.493925 -1.382912 -0.313591<br>1 -2.466633 -1.196924 0.629534<br>1 -1.672888 -0.957020 -0.611490                                                                                                          | 5 0.000007 0.331662 1.396448<br>6 -0.000020 1.221293 0.139122<br>8 -0.000047 2.156172 -0.627110<br>8 0.000005 -0.088229 -0.165724<br>1 1.031285 0.098221 1.962593<br>1 -1.031254 0.098180 1.962607<br>8 2.525178 -1.335538 -0.360735<br>1 1.649344 -0.913055 -0.365999<br>1 2.819227 -1.265362 0.552090<br>8 -2.525138 -1.335597 -0.360727<br>1 -2.819192 -1.265413 0.552097<br>1 -1.649312 -0.913097 -0.365993                                                                                                         |
| BH2COO-...3H2O       | 5 -1.079160 0.000023 1.399612<br>6 0.446749 -0.000006 1.203628<br>8 1.644391 -0.000026 1.373236<br>8 -0.224632 0.000002 0.039171<br>1 -1.661591 -1.027388 1.629640<br>1 -1.661553 1.027457 1.629633<br>8 2.468648 -0.000054 -1.368654<br>1 2.413911 -0.000050 -0.397586<br>1 1.536481 -0.000035 -1.607663<br>8 -1.463333 -2.442097 -0.879391<br>1 -1.941073 -2.363980 -0.048765<br>1 -0.862424 -1.683308 -0.828008<br>8 -1.463217 2.442153 -0.879399<br>1 -1.940967 2.364064 -0.048777<br>1 -0.862346 1.683335 -0.828008 | 5 -0.191041 -1.615487 1.063977<br>6 -0.030399 -0.097137 1.256674<br>8 0.086393 1.017600 1.723531<br>8 -0.053853 -0.428565 -0.040507<br>1 0.771150 -2.324637 1.128988<br>1 -1.282980 -2.104791 1.109374<br>8 0.311987 2.470278 -0.711270<br>1 0.250600 2.098780 0.186460<br>1 0.199828 1.693472 -1.269157<br>8 2.513490 -0.923858 -1.146677<br>1 2.754331 -1.754421 -0.826423<br>1 1.628698 -0.721803 -0.801216<br>8 -2.651888 -0.468375 -1.197485<br>1 -3.083020 -1.145053 -0.667469<br>1 -1.750047 -0.417932 -0.841215 |
| BH2O----CO ts        | 5 -0.063607 0.004674 -0.000008<br>1 -0.399467 -0.612610 1.018809<br>6 1.713568 0.150687 -0.000383<br>8 2.712243 0.733111 0.000102<br>8 0.206823 1.339690 -0.000118<br>1 -0.400190 -0.612711 -1.018501                                                                                                                                                                                                                                                                                                                    | 5 -1.095845 -0.558339 0.000073<br>1 -1.446617 -1.166113 1.010498<br>6 0.549374 -0.388110 -0.000245<br>8 1.588225 0.096014 0.000092<br>8 -0.953624 0.835572 -0.000007<br>1 -1.447213 -1.166217 -1.010071                                                                                                                                                                                                                                                                                                                 |
| BH2O----CO...H2O ts  | 5 0.289722 1.282201 0.312872<br>6 1.288727 -0.071096 0.312454<br>8 1.746951 -1.071453 -0.014096<br>8 -0.182093 0.568738 -0.786571<br>1 -0.342262 1.309845 1.372682<br>1 0.981661 2.288657 0.185919<br>8 -2.315135 -0.640510 0.098243<br>1 -1.505183 -0.219520 -0.338181<br>1 -2.312980 -0.217608 0.959893                                                                                                                                                                                                                | 5 0.410488 1.280264 0.338098<br>6 1.231867 -0.094389 0.262140<br>8 1.645258 -1.130608 -0.000800<br>8 -0.177265 0.587071 -0.775806<br>1 -0.213396 1.364867 1.385294<br>1 1.123806 2.249025 0.147545<br>8 -2.277954 -0.595315 0.090315<br>1 -1.446263 -0.124459 -0.264766<br>1 -2.428105 -0.213603 0.958924                                                                                                                                                                                                               |
| BH2O----CO...2H2O ts | 5 0.414588 0.611600 1.333642<br>6 -0.296337 1.301184 0.033326<br>8 -0.823223 1.467093 -0.972398<br>8 0.187045 -0.492513 0.468531<br>1 1.552840 1.043897 1.475197<br>1 -0.268325 0.782089 2.329118<br>8 2.582554 -0.807562 -0.651197<br>1 1.646604 -0.800839 -0.309031<br>1 3.009967 -0.178803 -0.065164<br>8 -2.266199 -1.375365 -0.052597<br>1 -2.331365 -0.901132 -0.884817<br>1 -1.346049 -1.143541 0.247818                                                                                                          | 5 -0.004806 0.242368 1.295802<br>6 0.033765 1.434431 0.224540<br>8 0.066109 2.078155 -0.723274<br>8 -0.015749 -0.432574 0.026516<br>1 1.012005 0.223981 1.973124<br>1 -1.012638 0.275473 1.979036<br>8 2.420426 -1.269238 -0.402417<br>1 1.477814 -0.960220 -0.255493<br>1 2.880581 -1.052107 0.412570<br>8 -2.480230 -1.181265 -0.411047<br>1 -2.932597 -0.961323 0.407526<br>1 -1.528171 -0.904850 -0.261235                                                                                                          |
| BH2O----CO...3H2O ts | 5 -1.185797 -0.000080 1.187394<br>6 -2.378878 -0.000007 0.114536                                                                                                                                                                                                                                                                                                                                                                                                                                                         | 5 -1.210041 -0.000605 1.239886<br>6 -2.290678 -0.000163 0.100639                                                                                                                                                                                                                                                                                                                                                                                                                                                        |

|              |                                                                                                                                                                                                                                                                                                                                                                                                                                                   |                                                                                                                                                                                                                                                                                                                                                                                                                                                   |
|--------------|---------------------------------------------------------------------------------------------------------------------------------------------------------------------------------------------------------------------------------------------------------------------------------------------------------------------------------------------------------------------------------------------------------------------------------------------------|---------------------------------------------------------------------------------------------------------------------------------------------------------------------------------------------------------------------------------------------------------------------------------------------------------------------------------------------------------------------------------------------------------------------------------------------------|
|              | 8 -3.037938 0.000023 -0.821376<br>8 -0.508092 -0.000062 -0.083259<br>1 -1.191926 1.014807 1.864756<br>1 -1.192000 -1.015011 1.864688<br>8 3.185776 0.000097 -0.194631<br>1 2.585032 -0.761721 -0.223006<br>1 2.584970 0.761867 -0.222984<br>8 1.088763 -2.046266 -0.140874<br>1 1.010076 -2.332080 0.772235<br>1 0.429775 -1.286232 -0.202269<br>8 1.088589 2.046280 -0.140819<br>1 1.009869 2.332058 0.772299<br>1 0.429672 1.286185 -0.202239   | 8 -2.948402 0.000291 -0.840208<br>8 -0.499765 -0.000273 -0.054553<br>1 -1.193368 1.016330 1.898284<br>1 -1.193475 -1.017916 1.897690<br>8 3.083293 0.000511 -0.158126<br>1 2.485582 -0.767014 -0.147710<br>1 2.485203 0.767742 -0.147524<br>8 1.085356 -2.031304 -0.180042<br>1 0.976985 -2.521029 0.640158<br>1 0.409000 -1.283487 -0.142453<br>8 1.084516 2.031410 -0.179599<br>1 0.975916 2.520975 0.640666<br>1 0.408442 1.283319 -0.142154   |
| BH2O-        | 5 0.000000 0.000000 0.014545<br>8 0.000000 0.000000 1.296008<br>1 0.000000 1.040387 -0.687452<br>1 0.000000 -1.040387 -0.687452                                                                                                                                                                                                                                                                                                                   | 5 0.000000 0.000000 -0.598675<br>8 0.000000 0.000000 0.693393<br>1 0.000000 1.035023 -1.276885<br>1 0.000000 -1.035023 -1.276885                                                                                                                                                                                                                                                                                                                  |
| BH2O-...H2O  | 5 1.432498 0.432485 0.000000<br>1 0.921074 1.566854 0.000004<br>1 2.668894 0.441961 -0.000001<br>8 0.727262 -0.648494 -0.000002<br>8 -1.767508 0.042426 0.000002<br>1 -0.812934 -0.313086 0.000001<br>1 -1.617551 0.990395 -0.000005                                                                                                                                                                                                              | 5 -1.457968 0.427536 0.000000<br>1 -0.978476 1.559546 0.000004<br>1 -2.681913 0.376076 -0.000004<br>8 -0.710328 -0.637048 0.000000<br>8 1.761955 0.033040 0.000000<br>1 0.777793 -0.234750 0.000000<br>1 1.759426 0.993510 -0.000003                                                                                                                                                                                                              |
| BH2O-...2H2O | 5 0.000003 1.324950 -0.000019<br>1 1.038385 1.989214 -0.000030<br>1 -1.038374 1.989221 -0.000031<br>8 -0.000001 0.028480 0.000003<br>8 2.574542 -0.644857 0.000012<br>1 1.584296 -0.520751 0.000011<br>1 2.882821 0.264090 -0.000008<br>8 -2.574544 -0.644855 0.000005<br>1 -2.882823 0.264092 -0.000009<br>1 -1.584298 -0.520750 0.000006                                                                                                        | 5 -0.000031 1.453339 0.000013<br>1 -1.038089 2.096042 0.000014<br>1 1.037994 2.096097 0.000058<br>8 0.000003 0.146099 -0.000016<br>8 -2.456174 -0.743933 0.000021<br>1 -1.510533 -0.410107 -0.000027<br>1 -3.000424 0.047643 -0.000135<br>8 2.456190 -0.743913 0.000019<br>1 3.000484 0.047631 -0.000142<br>1 1.510570 -0.410028 -0.000024                                                                                                        |
| BH2O-...3H2O | 5 -0.823833 -1.222543 -1.115846<br>8 -0.367410 -0.437666 -0.177585<br>1 -1.983933 -1.137358 -1.513890<br>1 -0.141514 -2.083348 -1.648314<br>8 1.694838 1.560895 -0.663710<br>1 0.813617 1.154957 -0.679743<br>1 2.183080 0.889786 -0.166833<br>8 -2.615436 0.740524 0.749889<br>1 -3.167126 0.383750 0.050057<br>1 -1.724911 0.381712 0.507763<br>8 1.953262 -0.869284 0.929930<br>1 1.763036 -0.644802 1.843300<br>1 1.054887 -0.787730 0.478697 | 5 0.620258 -1.666520 0.749178<br>8 0.300223 -0.638613 -0.000222<br>1 1.765127 -1.844607 1.127757<br>1 -0.207353 -2.488457 1.097858<br>8 -1.009609 1.756992 0.720182<br>1 -0.347405 1.052106 0.619565<br>1 -1.772734 1.355863 0.281530<br>8 2.480786 0.718208 -0.627957<br>1 3.164978 0.364769 -0.053466<br>1 1.660976 0.199845 -0.402676<br>8 -2.240546 -0.479265 -0.637861<br>1 -2.346534 -0.552048 -1.590206<br>1 -1.265189 -0.613454 -0.459378 |
| CO           | 6 0.000000 0.000000 -0.640461<br>8 0.000000 0.000000 0.480346                                                                                                                                                                                                                                                                                                                                                                                     | 6 0.000000 0.000000 -0.640410<br>8 0.000000 0.000000 0.480307                                                                                                                                                                                                                                                                                                                                                                                     |
| H2O          | 8 0.000000 0.000000 0.116508<br>1 0.000000 0.763311 -0.466031<br>1 0.000000 -0.763311 -0.466031                                                                                                                                                                                                                                                                                                                                                   | 8 0.000000 0.000000 0.117658<br>1 0.000000 0.761402 -0.470630<br>1 0.000000 -0.761402 -0.470630                                                                                                                                                                                                                                                                                                                                                   |

**Table S4.** Cartesian coordinates of selected compounds. M06-2X/PCM-H<sub>2</sub>O with Gaussian 09's calendar versions of the Dunning correlation consistent triple- $\zeta$  basis sets.

|                    | jun-cc-pVTZ                                                                                                                                                                                                                                                                                                                                                                                                                                                                                                                                                                                                                                                                                                                                                | jul-cc-pVTZ                                                                                                                                                                                                                                                                                                                                                                                                                                                                                                                                                                                                                                                                                                                                              | aug-cc-pVTZ                                                                                                                                                                                                                                                                                                                                                                                                                                                                                                                                                                                                                                                                                                                                                       |
|--------------------|------------------------------------------------------------------------------------------------------------------------------------------------------------------------------------------------------------------------------------------------------------------------------------------------------------------------------------------------------------------------------------------------------------------------------------------------------------------------------------------------------------------------------------------------------------------------------------------------------------------------------------------------------------------------------------------------------------------------------------------------------------|----------------------------------------------------------------------------------------------------------------------------------------------------------------------------------------------------------------------------------------------------------------------------------------------------------------------------------------------------------------------------------------------------------------------------------------------------------------------------------------------------------------------------------------------------------------------------------------------------------------------------------------------------------------------------------------------------------------------------------------------------------|-------------------------------------------------------------------------------------------------------------------------------------------------------------------------------------------------------------------------------------------------------------------------------------------------------------------------------------------------------------------------------------------------------------------------------------------------------------------------------------------------------------------------------------------------------------------------------------------------------------------------------------------------------------------------------------------------------------------------------------------------------------------|
| TMA                | 6 -0.583840 1.246683 0.063782<br>7 0.000011 -0.000012 -0.399364<br>6 -0.787853 -1.128901 0.063781<br>1 -0.823378 -1.179690 1.164060<br>1 -1.808872 -1.045869 -0.307511<br>1 -0.357544 -2.058562 -0.307359<br>6 1.371684 -0.117781 0.063774<br>1 1.433407 -0.123249 1.164041<br>1 1.810238 -1.043509 -0.307567<br>1 1.961562 0.719808 -0.307312<br>1 -0.610044 1.302838 1.164062<br>1 -0.001295 2.089300 -0.307442<br>1 -1.604097 1.339012 -0.307448                                                                                                                                                                                                                                                                                                        | 6 -1.369161 -0.144175 0.063573<br>7 -0.000059 -0.000015 -0.398629<br>6 0.559816 1.257896 0.063642<br>1 0.584270 1.315468 1.163807<br>1 1.578190 1.369206 -0.307045<br>1 -0.038509 2.088902 -0.308413<br>6 0.809547 -1.113691 0.063641<br>1 0.845771 -1.164716 1.163811<br>1 0.397266 -2.051147 -0.308109<br>1 1.828682 -1.010625 -0.307341<br>1 -1.431609 -0.150945 1.163820<br>1 -1.975022 0.681842 -0.307471<br>1 -1.789839 -1.078066 -0.307796                                                                                                                                                                                                                                                                                                        | 6 1.369741 0.138554 0.063573<br>7 0.000059 0.000015 -0.398629<br>6 -0.564974 -1.255588 0.063642<br>1 -0.589664 -1.313059 1.163807<br>1 -1.583796 -1.362717 -0.307045<br>1 0.029935 -2.089042 -0.308413<br>6 -0.804969 1.117004 0.063641<br>1 -0.840983 1.168178 1.163811<br>1 -0.388844 2.052760 -0.308109<br>1 -1.824518 1.018122 -0.307341<br>1 1.432217 0.145068 1.163820<br>1 1.972207 -0.689942 -0.307471<br>1 1.794249 1.070711 -0.307796                                                                                                                                                                                                                                                                                                                   |
| TMA-BH2COOH        | 7 -1.090329 0.065613 -0.000001<br>5 0.252303 0.949840 -0.000195<br>6 1.581218 0.035284 -0.000105<br>8 1.695615 -1.176613 0.000004<br>8 2.706803 0.794618 0.000033<br>1 3.468049 0.194309 0.000062<br>1 0.235019 1.625659 -0.999386<br>1 0.235018 1.626070 0.998705<br>6 -1.172779 -0.789840 -1.210630<br>1 -2.115316 -1.335902 -1.202778<br>1 -1.122871 -0.151412 -2.088730<br>1 -0.337845 -1.482706 -1.205420<br>6 -1.172248 -0.790095 1.210481<br>1 -2.114998 -1.335797 1.203169<br>1 -0.337582 -1.483279 1.204526<br>1 -1.121471 -0.151905 2.088702<br>6 -2.247760 0.993183 0.000346<br>1 -3.172140 0.417047 0.000254<br>1 -2.197437 1.616841 0.888485<br>1 -2.197569 1.617344 -0.887447                                                                | 7 1.090403 0.065531 -0.000004<br>5 -0.252281 0.949504 0.000173<br>6 -1.581207 0.035131 0.000063<br>8 -1.695995 -1.176577 0.000001<br>8 -2.706353 0.794802 -0.000034<br>1 -3.467444 0.194698 -0.000117<br>1 -0.235012 1.625352 0.999406<br>1 -0.235049 1.625700 -0.998824<br>6 1.172400 -0.790272 1.210169<br>1 2.115114 -1.336025 1.202402<br>1 1.121956 -0.152130 2.088450<br>1 0.337633 -1.483354 1.204252<br>6 1.172675 -0.789416 -1.210765<br>1 2.115438 -1.335086 -1.203228<br>1 0.337969 -1.482574 -1.205479<br>1 1.122320 -0.150657 -2.088605<br>6 2.247517 0.993101 0.000449<br>1 3.171907 0.416942 0.000397<br>1 2.197233 1.617196 -0.887407<br>1 2.196985 1.616638 0.888684                                                                    | 7 1.090414 0.065566 -0.000004<br>5 -0.252354 0.949487 0.000191<br>6 -1.581187 0.035058 0.000065<br>8 -1.695978 -1.176622 0.000001<br>8 -2.706223 0.794837 -0.000035<br>1 -3.467501 0.195222 -0.000123<br>1 -0.235146 1.625188 0.999519<br>1 -0.235185 1.625572 -0.998878<br>6 1.172357 -0.790332 1.210186<br>1 2.114929 -1.336183 1.202190<br>1 1.121992 -0.152176 2.088359<br>1 0.337427 -1.483115 1.204038<br>6 1.172652 -0.789397 -1.210837<br>1 2.115274 -1.335165 -1.203090<br>1 0.337785 -1.482258 -1.205378<br>1 1.122390 -0.150567 -2.088527<br>6 2.247614 0.993138 0.000489<br>1 3.171800 0.416836 0.000425<br>1 2.197179 1.617168 -0.887297<br>1 2.196917 1.616553 0.888692                                                                             |
| TMA-BH2COO-        | 7 -1.042968 0.067072 -0.000002<br>5 0.319640 0.963413 -0.000115<br>6 1.699054 0.093014 0.000010<br>8 1.702531 -1.176090 -0.000005<br>8 2.766911 0.778678 0.000009<br>1 0.243457 1.646749 -1.001857<br>1 0.243375 1.647083 1.001384<br>6 -1.106799 -0.788883 -1.207166<br>1 -2.032819 -1.364838 -1.198634<br>1 -1.081057 -0.148114 -2.085310<br>1 -0.242664 -1.445135 -1.197483<br>6 -1.106665 -0.788804 1.207220<br>1 -2.032924 -1.364384 1.199095<br>1 -0.242792 -1.445396 1.197236<br>1 -1.080295 -0.148010 2.085326<br>6 -2.211264 0.972952 0.000041<br>1 -3.130815 0.386897 -0.000175<br>1 -2.171293 1.598924 0.887391<br>1 -2.171087 1.599271 -0.887054                                                                                               | 7 0.013068 -0.006288 -0.000001<br>5 1.374135 0.891821 0.000234<br>6 2.754685 0.023126 0.000155<br>8 2.760317 -1.245749 -0.000020<br>8 3.821448 0.710277 0.000413<br>1 1.296994 1.575585 -1.001254<br>1 1.296889 1.575226 1.001961<br>6 -1.156384 0.897819 0.000062<br>1 -2.074960 0.310201 -0.000114<br>1 -1.117216 1.523759 0.887507<br>1 -1.117074 1.524067 -0.887159<br>6 -0.049459 -0.862321 1.206973<br>1 -0.974918 -1.439204 1.198490<br>1 0.815320 -1.517747 1.197030<br>1 -0.024184 -0.221510 2.085101<br>6 -0.049287 -0.861931 -1.207259<br>1 -0.974737 -1.438832 -1.199087<br>1 -0.023904 -0.220839 -2.085179<br>1 0.815497 -1.517351 -1.197412                                                                                                | 7 0.013068 -0.006288 -0.000001<br>5 1.374135 0.891821 0.000234<br>6 2.754685 0.023126 0.000155<br>8 2.760317 -1.245749 -0.000020<br>8 3.821448 0.710277 0.000413<br>1 1.296994 1.575585 -1.001254<br>1 1.296889 1.575226 1.001961<br>6 -1.156384 0.897819 0.000062<br>1 -2.074960 0.310201 -0.000114<br>1 -1.117216 1.523759 0.887507<br>1 -1.117074 1.524067 -0.887159<br>6 -0.049459 -0.862321 1.206973<br>1 -0.974918 -1.439204 1.198490<br>1 0.815320 -1.517747 1.197030<br>1 -0.024184 -0.221510 2.085101<br>6 -0.049287 -0.861931 -1.207259<br>1 -0.974737 -1.438832 -1.199087<br>1 -0.023904 -0.220839 -2.085179<br>1 0.815497 -1.517351 -1.197412                                                                                                         |
| TMA-BH2COO-...H2O  | 7 1.389258 0.316974 0.000005<br>5 -0.228638 0.460566 -0.000026<br>6 -1.022626 -0.963212 -0.000004<br>8 -0.434407 -2.076253 -0.000087<br>8 -2.300476 -0.876741 0.000116<br>1 -0.494606 1.095428 1.000290<br>1 -0.494566 1.095479 -1.000328<br>6 1.985817 1.670926 0.000221<br>1 3.073187 1.592219 -0.000264<br>1 1.652213 2.202425 -0.886847<br>1 1.653009 2.201771 0.887987<br>6 1.854408 -0.404447 -1.208405<br>1 2.942981 -0.464749 -1.200105<br>1 1.413323 -1.395738 -1.199828<br>1 1.523626 0.145524 -2.086077<br>6 1.854431 -0.404800 1.208202<br>1 2.943050 -0.464263 1.200332<br>1 1.522821 0.144400 2.086044<br>1 1.414054 -1.396394 1.198910<br>8 -3.305405 1.530476 -0.000002<br>1 -2.535309 2.104466 -0.000392<br>1 -2.905274 0.607123 0.000072 | 7 1.389104 0.316874 0.000008<br>5 -0.228754 0.460177 0.000032<br>6 -1.022671 -0.963503 0.000013<br>8 -0.434776 -2.076572 -0.000124<br>8 -2.300359 -0.876689 0.000151<br>1 -0.494703 1.095065 1.000439<br>1 -0.494722 1.095207 -1.000286<br>6 1.985350 1.670700 0.000265<br>1 3.072749 1.591967 -0.000242<br>1 1.651679 2.202111 -0.886869<br>1 1.652505 2.201395 0.888145<br>6 1.854183 -0.404250 -1.208362<br>1 2.942771 -0.464400 -1.199901<br>1 1.413215 -1.395611 -1.199994<br>1 1.523377 0.145959 -2.085896<br>6 1.854277 -0.404703 1.208075<br>1 2.942909 -0.464026 1.199967<br>1 1.522706 0.144669 2.085845<br>1 1.414006 -1.396362 1.198937<br>8 -3.304214 1.531300 -0.000011<br>1 -2.532964 2.103767 -0.000529<br>1 -2.905524 0.607475 0.000090 | 7 -0.001110 -0.003811 -0.000106<br>5 1.616532 0.141863 -0.000548<br>6 2.412601 -1.280660 -0.000286<br>8 1.826463 -2.394588 -0.000006<br>8 3.690147 -1.191836 -0.000573<br>1 1.881453 0.776717 -1.001244<br>1 1.881932 0.777322 0.999636<br>6 -0.599537 1.349199 0.000061<br>1 -1.686694 1.268586 0.000368<br>1 -0.266762 1.880616 0.887419<br>1 -0.267264 1.880611 -0.887487<br>6 -0.464806 -0.725927 1.208304<br>1 -1.553257 -0.787138 1.200263<br>1 -0.022657 -1.716688 1.199152<br>1 -0.133942 -0.175668 2.085668<br>6 -0.465505 -0.725925 -1.208251<br>1 -1.553953 -0.787115 -1.199588<br>1 -0.135136 -0.175669 -2.085804<br>1 -0.023367 -1.716691 -1.199356<br>8 4.689534 1.218154 0.000237<br>1 3.917053 1.788789 0.000047<br>1 4.292953 0.293632 -0.000968 |
| TMA-BH2COO-...2H2O | 7 -1.722842 0.266528 0.164936<br>5 -0.142616 0.512385 -0.101453<br>6 0.644985 -0.796635 -0.662806<br>8 0.078706 -1.866875 -0.979605<br>8 1.924868 -0.655608 -0.761708                                                                                                                                                                                                                                                                                                                                                                                                                                                                                                                                                                                      | 7 -1.721533 0.266354 0.163903<br>5 -0.142992 0.514836 -0.109807<br>6 0.646249 -0.795535 -0.665524<br>8 0.081587 -1.868646 -0.975004<br>8 1.925456 -0.652579 -0.767799                                                                                                                                                                                                                                                                                                                                                                                                                                                                                                                                                                                    | 7 -1.720446 0.265717 0.163837<br>5 -0.142755 0.516886 -0.111397<br>6 0.647841 -0.791460 -0.669991<br>8 0.084518 -1.864205 -0.982898<br>8 1.927044 -0.646961 -0.770477                                                                                                                                                                                                                                                                                                                                                                                                                                                                                                                                                                                             |



|                                 |                                                                                                                                                                                                                                                                                                                                                                                                                                                                                                                                                                                                                                                                                                                                                                                                                                                                                                                                                                            |                                                                                                                                                                                                                                                                                                                                                                                                                                                                                                                                                                                                                                                                                                                                                                                                                                                                                                                                                                            |                                                                                                                                                                                                                                                                                                                                                                                                                                                                                                                                                                                                                                                                                                                                                                                                                                                                                                                                                                            |
|---------------------------------|----------------------------------------------------------------------------------------------------------------------------------------------------------------------------------------------------------------------------------------------------------------------------------------------------------------------------------------------------------------------------------------------------------------------------------------------------------------------------------------------------------------------------------------------------------------------------------------------------------------------------------------------------------------------------------------------------------------------------------------------------------------------------------------------------------------------------------------------------------------------------------------------------------------------------------------------------------------------------|----------------------------------------------------------------------------------------------------------------------------------------------------------------------------------------------------------------------------------------------------------------------------------------------------------------------------------------------------------------------------------------------------------------------------------------------------------------------------------------------------------------------------------------------------------------------------------------------------------------------------------------------------------------------------------------------------------------------------------------------------------------------------------------------------------------------------------------------------------------------------------------------------------------------------------------------------------------------------|----------------------------------------------------------------------------------------------------------------------------------------------------------------------------------------------------------------------------------------------------------------------------------------------------------------------------------------------------------------------------------------------------------------------------------------------------------------------------------------------------------------------------------------------------------------------------------------------------------------------------------------------------------------------------------------------------------------------------------------------------------------------------------------------------------------------------------------------------------------------------------------------------------------------------------------------------------------------------|
|                                 | 1 -0.086123 1.415725 -0.909852<br>0.320208 0.856900 0.967374<br>6 -2.310582 1.508508 0.714913<br>1 -3.376759 1.362601 0.888551<br>1 -1.812091 1.750204 1.649585<br>1 -2.157702 2.314958 0.002785<br>6 -1.925528 -0.827794 1.144131<br>1 -2.991016 -0.949331 1.339403<br>1 -1.506373 -1.737478 0.727206<br>1 -1.409976 -0.566175 2.065112<br>6 -2.425825 -0.070538 -1.096442<br>1 -3.487073 -0.215225 -0.893264<br>1 -2.294005 0.752486 -1.794408<br>1 -1.983916 -0.976080 -1.498659<br>2 2.776352 1.872124 -0.793732<br>1 1.994108 2.381529 -0.567129<br>1 2.451679 0.932608 -0.776772<br>1 2.786318 -0.603502 1.836246<br>1 2.183184 0.020124 2.248473<br>1 2.500576 -0.620820 0.895931                                                                                                                                                                                                                                                                                   | 1 -0.091892 1.413405 -0.923982<br>0.322729 0.867503 0.955160<br>6 -2.310196 1.509595 0.709339<br>1 -3.375266 1.361650 0.888086<br>1 -1.808554 1.757632 1.640683<br>1 -2.162406 2.312437 -0.007943<br>6 -1.917562 -0.822949 1.149707<br>1 -2.982035 -0.946045 1.349509<br>1 -1.497671 -1.733879 0.736248<br>1 -1.399276 -0.554803 2.067289<br>6 -2.428293 -0.079162 -1.092818<br>1 -3.488395 -0.225234 -0.884662<br>1 -2.301107 0.740467 -1.795628<br>1 -1.985796 -0.985841 -1.491817<br>8 2.774194 1.875879 -0.785905<br>1 1.990977 2.381417 -0.554014<br>1 2.451760 0.935521 -0.774942<br>1 2.778535 -0.608189 1.835448<br>1 2.175570 0.016909 2.245627<br>1 2.497681 -0.623202 0.893956                                                                                                                                                                                                                                                                                  | 1 -0.093411 1.416677 -0.924333<br>0.323852 0.868604 0.953544<br>6 -2.310353 1.506983 0.712706<br>1 -3.374910 1.356970 0.892207<br>1 -1.807906 1.753486 1.643930<br>1 -2.164301 2.311473 -0.002964<br>6 -1.913527 -0.826025 1.147678<br>1 -2.977441 -0.950394 1.349254<br>1 -1.493606 -1.735474 0.731153<br>1 -1.393452 -0.559392 2.064604<br>6 -2.428363 -0.078388 -1.092734<br>1 -3.487741 -0.227180 -0.883230<br>1 -2.303721 0.743115 -1.793683<br>1 -1.984295 -0.983146 -1.494222<br>8 2.775168 1.881298 -0.775012<br>1 1.991086 2.384445 -0.541010<br>1 2.453661 0.940622 -0.769505<br>8 2.768521 -0.620158 1.835930<br>1 2.159226 -0.000951 2.245645<br>1 2.494258 -0.629756 0.892441                                                                                                                                                                                                                                                                                 |
| TMA-<br>BH2COO-<br>...3H2O      | 7 -2.072819 -0.047460 0.020083<br>5 -0.630678 0.620432 -0.289094<br>6 0.618694 -0.413005 -0.183407<br>8 0.482171 -1.658291 -0.036556<br>8 1.784248 0.119254 -0.271546<br>1 -0.705418 1.057439 -1.418124<br>1 -0.501260 1.517521 0.517388<br>6 -3.106646 1.009937 -0.055098<br>1 -4.087480 0.575880 0.138106<br>1 -2.885177 1.772222 0.686650<br>1 -3.085422 1.451559 -1.047729<br>6 -2.097505 -0.638348 1.379753<br>1 -3.090465 -1.038204 1.585307<br>1 -1.353231 -1.426693 1.423571<br>1 -1.858273 0.141322 2.098889<br>6 -2.398712 -1.097389 -0.975595<br>1 -3.381231 -1.514428 -0.754675<br>1 -2.404981 -0.644465 -1.963794<br>1 -1.634917 -1.865659 -0.921802<br>8 3.005155 -2.596750 -0.159673<br>1 2.052378 -2.337804 -0.097841<br>1 3.413661 -1.730610 -0.254921<br>8 1.815664 2.501836 -1.530951<br>1 0.885454 2.724407 -1.620514<br>1 1.800621 1.630247 -1.064137<br>8 2.062743 1.689483 1.975238<br>1 1.228690 2.162971 2.026571<br>1 1.975356 1.142931 1.165919 | 7 -2.068171 -0.063106 0.026052<br>5 -0.638873 0.618199 -0.311416<br>6 0.622292 -0.401266 -0.221081<br>8 0.501983 -1.646890 -0.063418<br>8 1.780985 0.142768 -0.330225<br>1 -0.736875 1.049600 -1.440873<br>1 -0.504910 1.520183 0.489126<br>6 -3.114384 0.982408 -0.038495<br>1 -4.086976 0.539171 0.174700<br>1 -2.888338 1.752290 0.694027<br>1 -3.114989 1.416975 -1.034507<br>6 -2.062940 -0.644892 1.389662<br>1 -3.047622 -1.054622 1.614688<br>1 -1.308937 -1.424354 1.425621<br>1 -1.820403 0.142447 2.099361<br>6 -2.399306 -1.123030 -0.956928<br>1 -3.373953 -1.548112 -0.717197<br>1 -2.425957 -0.676999 -1.947943<br>1 -1.627044 -1.883279 -0.910146<br>8 3.032687 -2.563468 -0.183187<br>1 2.078441 -2.309486 -0.122849<br>1 3.436481 -1.697460 -0.297078<br>8 1.748946 2.588959 -1.462625<br>1 0.812654 2.796396 -1.520476<br>1 1.759912 1.692928 -1.043999<br>8 2.063601 1.601368 1.996279<br>1 1.232449 2.078963 2.057444<br>1 1.983960 1.094886 1.161291 | 7 -2.068033 -0.063965 0.026165<br>5 -0.639570 0.618590 -0.311848<br>6 0.623340 -0.399615 -0.222539<br>8 0.503999 -1.645316 -0.064731<br>8 1.780698 0.145747 -0.332383<br>1 -0.738333 1.050177 -1.441155<br>1 -0.505547 1.520513 0.488792<br>6 -3.115320 0.980650 -0.037721<br>1 -4.087219 0.536510 0.176271<br>1 -2.889189 1.750675 0.694484<br>1 -3.116858 1.415026 -1.033707<br>6 -2.061659 -0.646092 1.389694<br>1 -3.045858 -1.056654 1.614947<br>1 -1.306987 -1.424846 1.424797<br>1 -1.819324 0.141271 2.099290<br>6 -2.398487 -1.124094 -0.956910<br>1 -3.372668 -1.549924 -0.716980<br>1 -2.425420 -0.677934 -1.947759<br>1 -1.625478 -1.883485 -0.910067<br>8 3.033797 -2.560994 -0.185475<br>1 2.079572 -2.306913 -0.124930<br>1 3.437522 -1.695079 -0.299929<br>8 1.745961 2.592439 -1.459813<br>1 0.809413 2.798333 -1.517633<br>1 1.758179 1.695671 -1.042586<br>8 2.063086 1.595179 1.998961<br>1 1.229662 2.068363 2.062472<br>1 1.985057 1.091556 1.162153 |
| TMA-<br>BH2COO-<br>ts           | 6 2.511769 0.931529 -0.000101<br>7 1.349847 0.067901 0.000022<br>6 1.288937 -0.749369 -1.194597<br>1 2.146353 -1.437463 -1.269013<br>1 0.367420 -1.331456 -1.180716<br>1 1.284467 -0.109092 -2.077167<br>1 1.288992 -0.749104 1.194823<br>1 2.146396 -1.437204 1.269338<br>1 1.284592 -0.108634 2.077253<br>1 0.367461 -1.331174 1.181130<br>1 3.455147 0.361861 -0.000058<br>1 2.496875 1.568114 -0.885189<br>1 2.496915 1.568314 0.884843<br>5 -0.955018 1.159561 -0.000069<br>6 -1.881024 -0.072040 -0.000034<br>8 -2.046063 -1.293794 0.000011<br>8 -2.785942 0.852281 -0.000086<br>1 -0.657756 1.674860 1.036473<br>1 -0.657721 1.674772 -1.036646                                                                                                                                                                                                                                                                                                                    | 6 2.513075 0.930292 -0.000101<br>7 1.350440 0.068035 0.000021<br>6 1.288560 -0.748946 -1.194447<br>1 2.145442 -1.437707 -1.269159<br>1 0.366601 -1.330353 -1.180375<br>1 1.284376 -0.108522 -2.076927<br>6 1.288615 -0.748682 1.194671<br>1 2.145485 -1.437448 1.269483<br>1 1.284500 -0.108066 2.077012<br>1 0.366643 -1.330073 1.180786<br>1 3.455853 0.359558 -0.000059<br>1 2.498814 1.566871 -0.885237<br>1 2.498854 1.567070 0.884893<br>5 -0.955505 1.159490 -0.000071<br>6 -1.881224 -0.072233 -0.000033<br>8 -2.047240 -1.293734 0.000014<br>8 -2.785354 0.852888 -0.000087<br>1 -0.657782 1.674627 1.036496<br>1 -0.657746 1.674535 -1.036674                                                                                                                                                                                                                                                                                                                    | 7 -0.004009 -0.015376 0.000008<br>5 -2.305376 1.084305 -0.000071<br>6 -3.235278 -0.144281 -0.000049<br>8 -3.405333 -1.365248 -0.000021<br>8 -4.136345 0.783765 -0.000087<br>1 -2.006005 1.598473 1.036477<br>1 -2.005976 1.598411 -1.036642<br>6 1.162277 0.842113 -0.000110<br>1 2.102512 0.267372 -0.000066<br>1 1.150529 1.478606 0.885233<br>1 1.150565 1.478803 0.884872<br>6 -0.068814 -0.832308 -1.194457<br>1 0.785560 -1.524058 -1.268904<br>1 -0.992921 -1.410123 -1.180046<br>1 -0.070784 -0.191850 -2.076822<br>6 -0.068760 -0.832049 1.194652<br>1 0.785602 -1.523802 1.269197<br>1 -0.070665 -0.191403 2.076880<br>1 -0.992878 -1.409849 1.180423                                                                                                                                                                                                                                                                                                            |
| TMA-<br>BH2COO-<br>...H2O<br>ts | 6 -2.699546 -1.398700 -0.445527<br>7 -1.824843 -0.323972 -0.024103<br>6 -2.277134 0.958422 -0.524972<br>1 -3.270102 1.228867 -0.131015<br>1 -1.561107 1.727680 -0.235789<br>1 -2.336271 0.927655 -1.613291<br>6 -1.672709 -0.295454 1.416684<br>1 -2.628962 -0.103225 1.929437<br>1 -1.282949 -1.252775 1.763724<br>1 -0.964292 0.487873 1.686431<br>1 -3.721967 -1.281861 -0.051038<br>1 -2.754460 -1.423853 -1.534061<br>1 -2.305596 -2.353257 -0.095829<br>5 0.665528 -0.293634 -0.767171<br>6 1.153124 1.001003 -0.092868<br>8 0.976743 2.009123 0.580915<br>8 2.263086 0.604185 -0.657271<br>1 0.786094 -1.332574 -0.188421                                                                                                                                                                                                                                                                                                                                           | 6 -2.698527 -1.404831 -0.438136<br>7 -1.824791 -0.326645 -0.024294<br>6 -2.275155 0.950908 -0.538469<br>1 -3.269425 1.225056 -0.150348<br>1 -1.560019 1.722753 -0.254026<br>1 -2.330655 0.909985 -1.626654<br>6 -1.676994 -0.284719 1.416411<br>1 -2.634830 -0.087798 1.924438<br>1 -1.288275 -1.238798 1.773449<br>1 -0.969446 0.501156 1.680990<br>1 -3.722070 -1.283767 -0.047762<br>1 -2.750198 -1.440178 -1.526570<br>1 -2.306002 -2.356194 -0.078207<br>5 0.669585 -0.296061 -0.757155<br>6 1.151522 1.004964 -0.091219<br>8 0.971000 2.018010 0.573860<br>8 2.264195 0.605510 -0.648192<br>1 0.789805 -1.330138 -0.169591                                                                                                                                                                                                                                                                                                                                           | 7 -1.824129 -0.325078 -0.024352<br>5 0.668170 -0.294658 -0.762689<br>6 1.152220 1.003012 -0.091971<br>8 0.974895 2.013325 0.577956<br>8 2.263022 0.604102 -0.653337<br>1 0.787885 -1.331283 -0.179421<br>1 0.282988 -0.272666 -1.891874<br>6 -2.699359 -1.400503 -0.442398<br>1 -3.721976 -1.280947 -0.049367<br>1 -2.753024 -1.429697 -1.530830<br>1 -2.306561 -2.353880 -0.088411<br>6 -2.274776 0.955591 -0.530640<br>1 -3.268102 1.228006 -0.139136<br>1 -1.558516 1.725180 -0.243190<br>1 -2.332142 0.920555 -1.618858<br>6 -1.673595 -0.291094 1.416331<br>1 -2.630318 -0.096438 1.927134<br>1 -1.284608 -1.247265 1.767185                                                                                                                                                                                                                                                                                                                                          |

|                                              |                                                                                                                                                                                                                                                                                                                                                                                                                                                                                                                                                                                                                                                                                                                                                                                                                                                                                                                                                                          |                                                                                                                                                                                                                                                                                                                                                                                                                                                                                                                                                                                                                                                                                                                                                                                                                                                                                                                                                                          |                                                                                                                                                                                                                                                                                                                                                                                                                                                                                                                                                                                                                                                                                                                                                                                                                                                                                                                                                                          |
|----------------------------------------------|--------------------------------------------------------------------------------------------------------------------------------------------------------------------------------------------------------------------------------------------------------------------------------------------------------------------------------------------------------------------------------------------------------------------------------------------------------------------------------------------------------------------------------------------------------------------------------------------------------------------------------------------------------------------------------------------------------------------------------------------------------------------------------------------------------------------------------------------------------------------------------------------------------------------------------------------------------------------------|--------------------------------------------------------------------------------------------------------------------------------------------------------------------------------------------------------------------------------------------------------------------------------------------------------------------------------------------------------------------------------------------------------------------------------------------------------------------------------------------------------------------------------------------------------------------------------------------------------------------------------------------------------------------------------------------------------------------------------------------------------------------------------------------------------------------------------------------------------------------------------------------------------------------------------------------------------------------------|--------------------------------------------------------------------------------------------------------------------------------------------------------------------------------------------------------------------------------------------------------------------------------------------------------------------------------------------------------------------------------------------------------------------------------------------------------------------------------------------------------------------------------------------------------------------------------------------------------------------------------------------------------------------------------------------------------------------------------------------------------------------------------------------------------------------------------------------------------------------------------------------------------------------------------------------------------------------------|
|                                              | 1 0.278714 -0.266756 -1.895652<br>8 3.740298 -1.513995 0.319689<br>1 3.124578 -2.250626 0.315546<br>1 3.219151 -0.757300 -0.012024                                                                                                                                                                                                                                                                                                                                                                                                                                                                                                                                                                                                                                                                                                                                                                                                                                       | 1 0.286991 -0.279130 -1.887318<br>8 3.743219 -1.518418 0.314793<br>1 3.126522 -2.254212 0.314190<br>1 3.220831 -0.760654 -0.011967                                                                                                                                                                                                                                                                                                                                                                                                                                                                                                                                                                                                                                                                                                                                                                                                                                       | 1 -0.965050 0.492897 1.683535<br>8 3.738522 -1.517134 0.317414<br>1 3.120162 -2.251457 0.314761<br>1 3.218863 -0.758543 -0.011822                                                                                                                                                                                                                                                                                                                                                                                                                                                                                                                                                                                                                                                                                                                                                                                                                                        |
| TMA-BH2COO-<br>...2H2O<br>ts                 | 7 -2.210617 -0.014256 -0.310874<br>5 0.428608 -0.031156 -0.522267<br>6 0.816342 0.005305 0.965346<br>8 0.578157 0.032570 2.160293<br>8 2.003854 -0.002903 0.388121<br>1 0.326808 -1.083626 -1.076030<br>1 0.318861 0.993013 -1.125142<br>6 -3.079491 -0.091577 -1.468031<br>1 -4.145357 -0.065493 -1.188964<br>1 -2.880892 0.746977 -2.135763<br>1 -2.891126 -1.018687 -2.009671<br>6 -2.390922 1.234431 0.402692<br>1 -3.413477 1.338804 0.799948<br>1 -1.685798 1.279260 1.232720<br>1 -2.195155 2.072503 -0.266621<br>6 -2.405060 -1.147716 0.571979<br>1 -3.430607 -1.186046 0.973527<br>1 -2.214652 -2.073878 0.028931<br>1 -1.703859 -1.079600 1.403567<br>8 3.078563 -2.321881 -0.718325<br>1 2.434427 -2.576489 -1.383296<br>1 2.705865 -1.519161 -0.310084<br>8 3.017962 2.339399 -0.737972<br>1 2.363208 2.568689 -1.399885<br>1 2.669530 1.522855 -0.324638                                                                                                   | 7 -2.209719 -0.014886 -0.308250<br>5 0.428445 -0.031733 -0.526355<br>6 0.820795 0.004727 0.960017<br>8 0.587863 0.031834 2.155857<br>8 2.005827 -0.002974 0.377588<br>1 0.324972 -1.084202 -1.079983<br>1 0.316092 0.992508 -1.128780<br>6 -3.082221 -0.091583 -1.462412<br>1 -4.147173 -0.064841 -1.179844<br>1 -2.885205 0.746955 -2.130688<br>1 -2.896139 -1.018814 -2.004697<br>6 -2.386778 1.233683 0.405840<br>1 -3.408098 1.338938 0.806060<br>1 -1.679235 1.277799 1.233860<br>1 -2.192181 2.071602 -0.264025<br>6 -2.401596 -1.148203 0.574940<br>1 -3.425797 -1.186166 0.979978<br>1 -2.213451 -2.074341 0.031045<br>1 -1.697562 -1.080503 1.404177<br>8 3.072651 -2.330569 -0.716417<br>1 2.426661 -2.586786 -1.378931<br>1 2.703666 -1.524079 -0.312396<br>8 3.006840 2.345629 -0.734386<br>1 2.348151 2.582116 -1.391731<br>1 2.664454 1.529578 -0.325959                                                                                                   | 7 -2.207602 -0.016166 -0.301558<br>5 0.428123 -0.032492 -0.539573<br>6 0.830325 0.003355 0.944124<br>8 0.606649 0.029534 2.141638<br>8 2.010932 -0.002773 0.352346<br>1 0.321176 -1.084708 -1.093096<br>1 0.309966 0.992118 -1.140341<br>6 -3.087350 -0.090731 -1.450418<br>1 -4.150413 -0.063097 -1.161231<br>1 -2.893366 0.748282 -2.118851<br>1 -2.905496 -1.017570 -1.994630<br>6 -2.379377 1.231794 0.415039<br>1 -3.398286 1.337494 0.821014<br>1 -1.667077 1.274033 1.238963<br>1 -2.187551 2.070095 -0.255029<br>6 -2.395127 -1.150323 0.581605<br>1 -3.416646 -1.187431 0.993211<br>1 -2.211574 -2.075894 0.035343<br>1 -1.685484 -1.084237 1.406089<br>8 3.061151 -2.351526 -0.707997<br>1 2.411293 -2.609704 -1.365881<br>1 2.701377 -1.535608 -0.314656<br>8 2.983796 2.373595 -0.721856<br>1 2.317956 2.610955 -1.371577<br>1 2.655682 1.545683 -0.325699                                                                                                   |
| TMA-BH2COO-<br>...3H2O<br>ts                 | 7 -2.663786 0.003207 0.085432<br>5 -0.085831 0.634562 0.655974<br>6 0.610479 -0.233250 -0.401466<br>8 0.665530 -1.036737 -1.322447<br>8 1.627850 0.344601 0.203936<br>1 -0.374497 1.761219 0.392421<br>1 -0.286857 0.186023 1.740438<br>6 -3.813307 0.539592 0.786771<br>1 -4.762537 0.146819 0.387288<br>1 -3.755346 0.280693 1.844070<br>1 -3.828394 1.625721 0.695545<br>6 -2.582989 -1.436806 0.233893<br>1 -3.461715 -1.945188 -0.195201<br>1 -1.687798 -1.802120 -0.269318<br>1 -2.519558 -1.695446 1.291158<br>6 -2.682425 0.376570 -1.315418<br>1 -3.565852 -0.025760 -1.837329<br>1 -2.695005 1.462859 -1.407369<br>1 -1.785098 -0.004574 -1.802845<br>8 3.430218 -1.476467 -1.437258<br>1 2.459826 -1.387952 -1.493959<br>1 3.656814 -0.832708 -0.759396<br>2 3.147888 3.018932 -0.323421<br>1 1.525149 3.505233 -0.074157<br>1 2.091183 2.086848 -0.159178<br>8 2.563216 -0.929297 2.519571<br>1 1.808838 -0.910065 3.113549<br>1 2.253140 -0.486360 1.710659 | 7 -2.662861 -0.000040 0.085795<br>5 -0.087127 0.634052 0.659317<br>6 0.611496 -0.223967 -0.404588<br>8 0.668898 -1.020740 -1.331119<br>8 1.627115 0.352059 0.205257<br>1 -0.378811 1.761971 0.404385<br>1 -0.286632 0.171495 1.740461<br>6 -3.815123 0.525521 0.790373<br>1 -4.762261 0.131874 0.386755<br>1 -3.756906 0.258155 1.845580<br>1 -3.834802 1.612311 0.708002<br>6 -2.575817 -1.440624 0.222577<br>1 -3.452085 -1.949318 -0.211160<br>1 -1.678734 -1.797809 -0.283088<br>1 -2.511888 -1.707466 1.277790<br>6 -2.681677 0.384771 -1.311720<br>1 -3.562813 -0.017048 -1.837888<br>1 -2.698916 1.471732 -1.394626<br>1 -1.782168 0.011526 -1.801244<br>8 3.432443 -1.469728 -1.437833<br>1 2.462718 -1.376108 -1.496620<br>1 3.661660 -0.828218 -0.758782<br>2 3.068999 3.032716 -0.293439<br>1 1.515463 3.514436 -0.041097<br>1 2.085514 2.098437 -0.139353<br>8 2.560205 -0.962629 2.498701<br>1 1.806267 -0.948823 3.093387<br>1 2.252307 -0.503754 1.697955 | 7 -2.661954 0.001816 -0.084924<br>5 -0.087180 -0.636017 -0.665157<br>6 0.612263 0.214753 0.403889<br>8 0.671207 1.006945 1.334194<br>8 1.626714 -0.359841 -0.209226<br>1 -0.381234 -1.764823 -0.416888<br>1 -0.286441 -0.166400 -1.743323<br>6 -3.817918 -0.516596 -0.788926<br>1 -4.762527 -0.121584 -0.380955<br>1 -3.761389 -0.244484 -1.842916<br>1 -3.840926 -1.603587 -0.711414<br>6 -2.570760 1.442829 -0.215125<br>1 -3.444402 1.952017 0.223102<br>1 -1.671328 1.794458 0.290066<br>1 -2.508465 1.714266 -1.269185<br>6 -2.678756 -0.389306 1.310975<br>1 -3.557462 0.012767 1.840832<br>1 -2.699021 -1.476519 1.388799<br>1 -1.776947 -0.020943 1.799799<br>8 3.432667 1.456049 1.445557<br>1 2.462955 1.360705 1.501783<br>1 3.664853 0.817493 0.764853<br>8 2.302981 -3.046604 0.257102<br>1 1.508566 -3.522476 0.003242<br>1 2.083951 -2.109946 0.115067<br>8 2.555807 1.007317 -2.472352<br>1 1.802710 0.997017 -2.068080<br>1 2.252711 0.528399 -1.681606 |
| BH <sub>2</sub> COO <sup>-</sup>             | 5 1.215134 -0.548306 0.000011<br>6 -0.281378 -0.171624 0.000025<br>8 -1.500144 -0.200822 0.000002<br>8 0.510157 0.882412 -0.000018<br>1 1.766343 -0.840665 1.028135<br>1 1.766149 -0.840789 -1.028208                                                                                                                                                                                                                                                                                                                                                                                                                                                                                                                                                                                                                                                                                                                                                                    | 5 -1.215420 -0.547720 0.000173<br>6 0.281299 -0.171638 -0.001185<br>8 1.500378 -0.201078 0.000334<br>8 -0.509816 0.882421 0.000335<br>1 -1.768567 -0.840275 -1.026589<br>1 -1.766621 -0.842047 1.027486                                                                                                                                                                                                                                                                                                                                                                                                                                                                                                                                                                                                                                                                                                                                                                  | 5 1.214440 -0.548862 0.000012<br>1 1.765620 -0.841741 -1.027917<br>6 -0.281019 -0.170786 0.000038<br>8 -1.499844 -0.201203 0.000072<br>8 0.510169 0.882745 -0.000113<br>1 1.765688 -0.841567 1.027955                                                                                                                                                                                                                                                                                                                                                                                                                                                                                                                                                                                                                                                                                                                                                                    |
| BH <sub>2</sub> COO-<br>...H <sub>2</sub> O  | 5 -0.390591 1.358611 -0.248605<br>6 -1.105224 0.000846 -0.108640<br>8 -1.854011 -0.945888 -0.237987<br>8 -0.084815 0.126517 0.735234<br>1 0.433915 1.510207 -1.110251<br>1 -0.828715 2.336439 0.290370<br>8 2.525900 -0.491500 -0.090225<br>1 1.619463 -0.333761 0.225599<br>1 2.663045 0.175951 -0.767028                                                                                                                                                                                                                                                                                                                                                                                                                                                                                                                                                                                                                                                               | 5 -0.389077 1.358248 -0.248358<br>6 -1.105423 0.001239 -0.108474<br>8 -1.854939 -0.944786 -0.237713<br>8 -0.084580 0.125919 0.735126<br>1 0.435364 1.509091 -1.110299<br>1 -0.825943 2.336729 0.290678<br>8 2.525445 -0.491802 -0.090597<br>1 1.619330 -0.334138 0.225908<br>1 2.661763 0.174994 -0.768179                                                                                                                                                                                                                                                                                                                                                                                                                                                                                                                                                                                                                                                               | 5 -0.387496 1.357961 -0.248409<br>6 -1.105106 0.001611 -0.108434<br>8 -1.855175 -0.943978 -0.237898<br>8 -0.084587 0.125793 0.735458<br>1 0.437375 1.507550 -1.110234<br>1 -0.823520 2.337141 0.289990<br>8 2.524226 -0.492453 -0.090963<br>1 1.618309 -0.335753 0.226322<br>1 2.660244 0.176689 -0.766205                                                                                                                                                                                                                                                                                                                                                                                                                                                                                                                                                                                                                                                               |
| BH <sub>2</sub> COO-<br>...2H <sub>2</sub> O | 5 0.000001 0.371580 1.375900<br>6 0.000023 1.279900 0.133476<br>8 0.000084 2.225935 -0.619425<br>8 -0.000008 -0.023594 -0.190753<br>1 1.030769 0.128674 1.938687<br>1 -1.030745 0.128927 1.938837<br>8 2.450251 -1.421979 -0.344756<br>1 1.607051 -0.939310 -0.350878<br>1 2.738987 -1.392184 0.570762<br>8 -2.450331 -1.421875 -0.344768<br>1 -2.739063 -1.392049 0.570750<br>1 -1.607109 -0.939246 -0.350898                                                                                                                                                                                                                                                                                                                                                                                                                                                                                                                                                           | 5 -0.000025 0.368777 1.375310<br>6 0.000027 1.279092 0.134128<br>8 0.000067 2.225609 -0.617943<br>8 0.000001 -0.024107 -0.191423<br>1 1.030715 0.124696 1.937897<br>1 -1.030805 0.124719 1.937831<br>8 2.450252 -1.420433 -0.344922<br>1 1.606486 -0.938972 -0.351905<br>1 2.739477 -1.387904 0.570316<br>8 -2.450303 -1.420351 -0.344941<br>1 -2.739529 -1.387798 0.570296<br>1 -1.606519 -0.938921 -0.351927                                                                                                                                                                                                                                                                                                                                                                                                                                                                                                                                                           | 5 -0.000005 0.365647 1.374452<br>6 0.000029 1.278118 0.134783<br>8 0.000071 2.225914 -0.615653<br>8 -0.000004 -0.024441 -0.193002<br>1 1.030809 0.120794 1.936664<br>1 -1.030831 0.120894 1.936685<br>8 2.450258 -1.418807 -0.344913<br>1 1.605853 -0.938700 -0.354641<br>1 2.735659 -1.386514 0.571465<br>8 -2.450325 -1.418712 -0.344924<br>1 -2.735732 -1.386402 0.571452<br>1 -1.605902 -0.938638 -0.354649                                                                                                                                                                                                                                                                                                                                                                                                                                                                                                                                                          |

|                               |                            |           |           |           |           |           |           |           |           |           |           |           |           |
|-------------------------------|----------------------------|-----------|-----------|-----------|-----------|-----------|-----------|-----------|-----------|-----------|-----------|-----------|-----------|
| BH2COO-<br>...3H2O<br>bridged | 5                          | -0.979913 | 0.000017  | 1.328528  | 5         | -0.989179 | 0.000048  | 1.330390  | 5         | -0.996965 | 0.000026  | 1.330523  |           |
|                               | 6                          | -2.009614 | -0.000025 | 0.184729  | 6         | -2.013284 | -0.000037 | 0.181541  | 6         | -2.016015 | 0.000001  | 0.177041  |           |
|                               | 8                          | -3.027857 | -0.000017 | -0.464935 | 8         | -3.027677 | 0.000001  | -0.473853 | 8         | -3.027254 | -0.000022 | -0.483088 |           |
|                               | 8                          | -0.745224 | 0.000017  | -0.274906 | 8         | -0.745998 | -0.000038 | -0.271068 | 8         | -0.746660 | 0.000003  | -0.269820 |           |
|                               | 1                          | -0.679200 | 1.031346  | 1.860464  | 1         | -0.690682 | 1.031267  | 1.863921  | 1         | -0.701695 | 1.031335  | 1.865661  |           |
|                               | 1                          | -0.679358 | -1.031245 | 1.860685  | 1         | -0.691119 | -1.031017 | 1.864465  | 1         | -0.701678 | -1.031263 | 1.865690  |           |
|                               | 8                          | 2.954337  | -0.000010 | 0.253801  | 8         | 2.962231  | 0.000022  | 0.244139  | 8         | 2.969778  | -0.000003 | 0.227988  |           |
|                               | 1                          | 2.401479  | -0.766608 | 0.036870  | 1         | 2.406959  | -0.766495 | 0.032876  | 1         | 2.411671  | -0.766583 | 0.024740  |           |
|                               | 1                          | 2.401382  | 0.766456  | 0.036544  | 1         | 2.406950  | 0.766583  | 0.033056  | 1         | 2.411621  | 0.766522  | 0.024672  |           |
|                               | 8                          | 1.095148  | -2.084342 | -0.455968 | 8         | 1.096217  | -2.081532 | -0.449574 | 8         | 1.096417  | -2.080558 | -0.438187 |           |
|                               | 1                          | 0.912728  | -2.679039 | 0.276780  | 1         | 0.914507  | -2.675963 | 0.283540  | 1         | 0.914679  | -2.665032 | 0.302803  |           |
|                               | 1                          | 0.357584  | -1.448416 | -0.457742 | 1         | 0.358550  | -1.445660 | -0.451445 | 1         | 0.361050  | -1.442109 | -0.445377 |           |
|                               | 1                          | 0.095128  | 2.084362  | -0.455965 | 1         | 0.096167  | 2.081510  | -0.449594 | 1         | 0.096411  | 2.080561  | -0.438203 |           |
|                               | 1                          | 0.912876  | 2.678997  | 0.276875  | 1         | 0.914374  | 2.675975  | 0.283472  | 1         | 0.914708  | 2.665010  | 0.302816  |           |
|                               | 1                          | 0.357501  | 1.448513  | -0.457709 | 1         | 0.358537  | 1.445595  | -0.451476 | 1         | 0.361024  | 1.442135  | -0.445400 |           |
|                               | BH2O---CO<br>ts            | 5         | -1.094122 | -0.559568 | 0.000128  | 5         | -1.093866 | -0.559599 | 0.000129  | 5         | -1.093866 | -0.559599 | 0.000129  |
| 1                             |                            | -1.435487 | -1.175185 | 1.009590  | 1         | -1.435687 | -1.175290 | 1.009454  | 1         | -1.435687 | -1.175290 | 1.009454  |           |
| 6                             |                            | 0.559736  | -0.391622 | -0.000044 | 6         | 0.559424  | -0.391337 | -0.000033 | 6         | 0.559424  | -0.391337 | -0.000033 |           |
| 8                             |                            | 1.591674  | 0.104645  | -0.000159 | 8         | 1.591376  | 0.104364  | -0.000170 | 8         | 1.591376  | 0.104364  | -0.000170 |           |
| 8                             |                            | -0.968752 | 0.832607  | 0.000065  | 8         | -0.968331 | 0.832719  | 0.000068  | 8         | -0.968331 | 0.832719  | 0.000068  |           |
| 1                             |                            | -2.435695 | -1.175256 | -1.009219 | 1         | -2.435884 | -1.175361 | -1.009085 | 1         | -2.435884 | -1.175361 | -1.009085 |           |
| BH2O---<br>CO...H2O<br>ts     | 5                          | 0.424212  | 1.281104  | 0.336412  | 5         | 0.425975  | 1.281495  | 0.337798  | 5         | 0.420967  | 1.280309  | 0.336988  |           |
|                               | 6                          | 1.239503  | -0.100331 | 0.261611  | 6         | 1.237622  | -0.102403 | 0.261465  | 6         | 1.239487  | -0.099285 | 0.261554  |           |
|                               | 8                          | 1.637015  | -1.140680 | -0.005950 | 8         | 1.632401  | -1.143227 | -0.007219 | 8         | 1.639953  | -1.138154 | -0.006242 |           |
|                               | 8                          | -0.184345 | 0.599411  | -0.769952 | 8         | -0.184004 | 0.603168  | -0.769890 | 8         | -0.185160 | 0.598110  | -0.770536 |           |
|                               | 1                          | -0.184013 | 1.371625  | 1.392912  | 1         | -0.182523 | 1.372398  | 1.394141  | 1         | -0.188500 | 1.368394  | 1.399053  |           |
|                               | 1                          | 1.147102  | 2.242722  | 0.142575  | 1         | 1.151811  | 2.241303  | 0.145838  | 1         | 1.141701  | 2.243940  | 0.144374  |           |
|                               | 8                          | -2.278544 | -0.597264 | 0.091889  | 8         | -2.276079 | -0.596402 | 0.091250  | 8         | -2.279410 | -0.596292 | 0.090916  |           |
|                               | 1                          | -1.448940 | -0.117414 | -0.256358 | 1         | -1.447054 | -0.115082 | -0.256929 | 1         | -1.448730 | -0.117891 | -0.257570 |           |
|                               | 1                          | -2.465242 | -0.192204 | 0.941256  | 1         | -2.456388 | -0.199993 | 0.946037  | 1         | -2.449291 | -0.205950 | 0.952172  |           |
|                               | BH2O---<br>CO...2H2O<br>ts | 5         | -0.000025 | 0.281656  | 1.301051  | 5         | -0.000021 | 0.273330  | 1.302360  | 5         | 0.000096  | 0.274191  | 1.303131  |
| 6                             |                            | 0.000193  | 1.425534  | 0.211590  | 6         | 0.000176  | 1.418242  | 0.213527  | 6         | -0.000349 | 1.417769  | 0.213096  |           |
| 8                             |                            | 0.000325  | 2.094400  | -0.720353 | 8         | 0.000302  | 2.087550  | -0.717790 | 8         | -0.000642 | 2.086152  | -0.718883 |           |
| 8                             |                            | -0.000079 | -0.396509 | 0.005900  | 8         | -0.000075 | -0.404215 | 0.006867  | 8         | 0.000144  | -0.404536 | 0.008152  |           |
| 1                             |                            | 1.015003  | 0.261553  | 1.966996  | 1         | 1.014951  | 0.252945  | 1.968450  | 1         | 1.015192  | 0.254908  | 1.969015  |           |
| 1                             |                            | -1.015110 | 0.261868  | 1.966917  | 1         | -1.015042 | 0.253233  | 1.968384  | 1         | -1.014828 | 0.254325  | 1.969259  |           |
| 8                             |                            | 2.443389  | -1.247113 | -0.398577 | 8         | 2.449266  | -1.235800 | -0.401079 | 8         | 2.448772  | -1.235141 | -0.401279 |           |
| 1                             |                            | 1.504373  | -0.930804 | -0.257229 | 1         | 1.507816  | -0.927354 | -0.258695 | 1         | 1.507468  | -0.926370 | -0.258431 |           |
| 1                             |                            | 2.876319  | -1.128450 | 0.449519  | 1         | 2.882286  | -1.112706 | 0.446320  | 1         | 2.883370  | -1.108580 | 0.444724  |           |
| 8                             |                            | -2.443681 | -1.246687 | -0.398618 | 8         | -2.449537 | -1.235401 | -0.401118 | 8         | -2.448312 | -1.235663 | -0.401228 |           |
| 1                             |                            | -2.876637 | -1.127858 | 0.449441  | 1         | -2.882569 | -1.112209 | 0.446260  | 1         | -2.882211 | -1.111627 | 0.445508  |           |
| 1                             |                            | -1.504617 | -0.930524 | -0.257253 | 1         | -1.508045 | -0.927091 | -0.258714 | 1         | -1.507060 | -0.926721 | -0.258404 |           |
| BH2O---<br>CO...3H2O<br>ts    | 5                          | -1.216183 | 0.000000  | 1.238210  | 5         | -1.218150 | 0.000000  | 1.237351  | 5         | -1.224511 | -0.000001 | 1.237590  |           |
|                               | 6                          | -2.291985 | 0.000000  | 0.094048  | 6         | -2.294412 | 0.000000  | 0.093152  | 6         | -2.297437 | -0.000001 | 0.090444  |           |
|                               | 8                          | -2.937747 | 0.000000  | -0.854421 | 8         | -2.940149 | 0.000000  | -0.855020 | 8         | -2.940865 | 0.000000  | -0.859295 |           |
|                               | 8                          | -0.489567 | 0.000000  | -0.043965 | 8         | -0.491524 | 0.000000  | -0.044782 | 8         | -0.494560 | -0.000001 | -0.042744 |           |
|                               | 1                          | -1.208756 | 1.016008  | 1.899004  | 1         | -1.210785 | 1.015927  | 1.898386  | 1         | -1.219105 | 1.015888  | 1.898647  |           |
|                               | 1                          | 1.208756  | -1.016008 | 1.899004  | 1         | 1.210785  | -1.015926 | 1.898386  | 1         | 1.219105  | -1.015889 | 1.898647  |           |
|                               | 8                          | 3.073995  | 0.000000  | -0.175965 | 8         | 3.076993  | 0.000000  | -0.178437 | 8         | 3.080981  | 0.000001  | -0.183242 |           |
|                               | 1                          | 2.477255  | -0.766902 | -0.155059 | 1         | 2.480290  | -0.766854 | -0.155558 | 1         | 2.484082  | -0.766622 | -0.157960 |           |
|                               | 1                          | 2.477255  | 0.766903  | -0.155059 | 1         | 2.480290  | 0.766853  | -0.155558 | 1         | 2.484081  | 0.766623  | -0.157958 |           |
|                               | 8                          | 1.082536  | -2.043488 | -0.169148 | 8         | 1.084728  | -2.040288 | -0.166605 | 8         | 1.087446  | -2.035956 | -0.162920 |           |
|                               | 1                          | 0.983884  | -2.522554 | 0.657118  | 1         | 0.982000  | -2.522927 | 0.656977  | 1         | 0.987435  | -2.517083 | 0.661782  |           |
|                               | 1                          | 0.417014  | -1.286295 | -0.128144 | 1         | 0.418000  | -1.284112 | -0.126837 | 1         | 0.419400  | -1.280957 | -0.123294 |           |
|                               | 8                          | 1.082536  | 2.043488  | -0.169148 | 8         | 1.084728  | 2.040287  | -0.166606 | 8         | 1.087443  | 2.035957  | -0.162920 |           |
|                               | 1                          | 0.983884  | 2.522554  | 0.657118  | 1         | 0.982001  | 2.522927  | 0.656977  | 1         | 0.987431  | 2.517083  | 0.661782  |           |
| 1                             | 0.417014                   | 1.286295  | -0.128144 | 1         | 0.418001  | 1.284112  | -0.126837 | 1         | 0.419399  | 1.280957  | -0.123295 |           |           |
| BH2O-                         | 5                          | 0.000000  | 0.000000  | -0.599530 | 5         | 0.000000  | 0.000000  | -0.599530 | 5         | 0.000000  | 0.000000  | -0.599207 |           |
|                               | 1                          | 0.000000  | 1.034209  | -1.278209 | 1         | 0.000000  | 1.034209  | -1.278209 | 1         | 0.000000  | 1.034694  | -1.278340 |           |
|                               | 1                          | 0.000000  | -1.034209 | -1.278209 | 1         | 0.000000  | -1.034209 | -1.278209 | 1         | 0.000000  | -1.034694 | -1.278340 |           |
|                               | 8                          | 0.000000  | 0.000000  | 0.694259  | 8         | 0.000000  | 0.000000  | 0.694259  | 8         | 0.000000  | 0.000000  | 0.694090  |           |
|                               | BH2O-<br>...H2O            | 5         | -0.001107 | 0.000409  | 0.000085  | 5         | 0.002466  | -0.009339 | -0.018911 | 5         | 0.001692  | -0.009314 | -0.017264 |
|                               |                            | 1         | 0.464617  | 1.113968  | 0.230675  | 1         | 0.469094  | 1.102723  | 0.217883  | 1         | 0.467302  | 1.102342  | 0.222702  |
|                               |                            | 1         | -1.223308 | -0.055566 | -0.047490 | 1         | -1.219376 | -0.061344 | -0.076041 | 1         | -1.220193 | -0.063438 | -0.070459 |
|                               |                            | 8         | 0.759290  | -1.041413 | -0.179616 | 8         | 0.761448  | -1.052470 | -0.196083 | 8         | 0.762030  | -1.050640 | -0.200360 |
| 8                             |                            | 3.225807  | -0.374837 | 0.023725  | 8         | 3.225946  | -0.380849 | 0.009795  | 8         | 3.226175  | -0.381030 | 0.006050  |           |
| 1                             |                            | 2.244308  | -0.637957 | -0.056780 | 1         | 2.244970  | -0.648235 | -0.072192 | 1         | 2.244536  | -0.646743 | -0.074717 |           |
| 1                             |                            | 3.218612  | 0.566800  | 0.206576  | 1         | 3.212800  | 0.560948  | 0.191555  | 1         | 3.215806  | 0.560258  | 0.190053  |           |
| BH2O-<br>...2H2O              |                            | 5         | -0.000069 | 1.452622  | -0.000078 | 5         | 0.000069  | 1.452622  | 0.000078  | 5         | 0.000279  | 1.452717  | 0.000044  |
|                               | 1                          | 1.037584  | 2.095393  | -0.000041 | 1         | -1.037584 | 2.095393  | 0.000041  | 1         | 1.038025  | 2.095160  | -0.000033 |           |
|                               | 1                          | -1.037798 | 2.095269  | -0.000035 | 1         | 1.037798  | 2.095269  | 0.000035  | 1         | -1.037159 | 2.095657  | -0.000060 |           |
|                               | 8                          | 0.000008  | 0.143968  | -0.000155 | 8         | -0.000008 | 0.143968  | 0.000155  | 8         | -0.000033 | 0.144141  | 0.000230  |           |
|                               | 8                          | 2.454056  | -0.742707 | 0.000118  | 8         | -2.454056 | -0.742707 | -0.000118 | 8         | 2.452924  | -0.742927 | -0.000139 |           |
|                               | 1                          | 1.508105  | -0.407173 | -0.000206 | 1         | -1.508105 | -0.407173 | 0.000206  | 1         | 1.507238  | -0.406825 | 0.000365  |           |
|                               | 1                          | 2.999957  | 0.046321  | 0.000172  | 1         | -2.999957 | 0.046321  | -0.000172 | 1         | 2.999560  | 0.045464  | -0.000299 |           |
|                               | 8                          | -2.454022 | -0.742751 | 0.000103  | 8         | 2.454022  | -0.742751 | -0.000103 | 8         | -2.453061 | -0.742749 | -0.000120 |           |
|                               | 1                          | -2.999818 | 0.046350  | 0.000166  | 1         | 2.999818  | 0.046350  | -0.000166 | 1         | -3.000126 | 0.045342  | -0.000297 |           |
|                               | 1                          | -1.508024 | -0.407349 | -0.000190 | 1         | 1.508024  | -0.407349 | 0.000190  | 1         | -1.507572 | -0.406096 | 0.000334  |           |
| BH2O-<br>...3H2O              | 5                          | 0.594478  | 1.767977  | -0.636056 | 5         | 0.593266  | 1.778498  | -0.611042 | 5         | 0.601065  | -1.778238 | 0.612622  |           |
|                               | 8                          | 0.264828  | 0.677464  | 0.016192  | 8         | 0.260665  | 0.671255  | 0.010686  | 8         | 0.264975  | -0.668872 | -0.003464 |           |
|                               | 1                          | 1.747525  | 1.988673  | -0.963109 | 1         | 1.749387  | 2.013038  | -0.916876 | 1         | 1.758391  | -2.012138 | 0.914148  |           |
|                               | 1                          | -0.232216 | 2.607787  | -0.940361 | 1         | -0.233501 | 2.621224  | -0.906872 | 1         | -0.223507 | -2.623603 | 0.906862  |           |
|                               | 8                          | -0.859572 | -1.823912 | -0.651601 | 8         | -0.849930 | -1.839336 | -0.622512 | 8         | -0.862396 | 1.836711  | 0.625616  |           |
|                               | 1                          | -0.252081 | -1.073282 | -0.546022 | 1         | -0.252352 | -1.079843 | -0.521923 | 1         | -0.262843 |           |           |           |

|     |                                                                                                                                                                                                    |                                                                                                                                                                                                     |                                                                                                                                                                                                          |
|-----|----------------------------------------------------------------------------------------------------------------------------------------------------------------------------------------------------|-----------------------------------------------------------------------------------------------------------------------------------------------------------------------------------------------------|----------------------------------------------------------------------------------------------------------------------------------------------------------------------------------------------------------|
|     | 8 2.448264 -0.704439 0.574969<br>1 3.133231 -0.339941 0.010279<br>1 1.631875 -0.171841 0.371756<br>8 -2.297701 0.412687 0.520065<br>1 -2.457758 0.536786 1.458278<br>1 -1.320182 0.578083 0.383011 | 8 2.457903 -0.697388 0.557623<br>1 3.139104 -0.324516 -0.006057<br>1 1.637383 -0.170241 0.358898<br>8 -2.308839 0.411125 0.493893<br>1 -2.486470 0.589502 1.419995<br>1 -1.330774 0.575468 0.363473 | 8 2.453489 0.705402 -0.560986<br>1 3.138667 0.335439 -0.000312<br>1 1.635245 0.175978 -0.357308<br>8 -2.302953 -0.418889 -0.500506<br>1 -2.473834 -0.597809 -1.427712<br>1 -1.324963 -0.578254 -0.364027 |
| CO  | 6 0.000000 0.000000 -0.640842<br>8 0.000000 0.000000 0.480632                                                                                                                                      | 6 0.000000 0.000000 -0.640765<br>8 0.000000 0.000000 0.480574                                                                                                                                       | 6 0.000000 0.000000 -0.640741<br>8 0.000000 0.000000 0.480556                                                                                                                                            |
| H2O | 8 0.000000 0.000000 0.117378<br>1 0.000000 0.761141 -0.469512<br>1 0.000000 -0.761141 -0.469512                                                                                                    | 8 0.000000 0.000000 0.117378<br>1 0.000000 0.761141 -0.469512<br>1 0.000000 -0.761141 -0.469512                                                                                                     | 8 0.000000 0.000000 0.117378<br>1 0.000000 0.761141 -0.469512<br>1 0.000000 -0.761141 -0.469512                                                                                                          |

**Table S5.** Energies of 3-membered ring decarbonylation reactants, transition states and products (gas phase, a.u.)<sup>a,b</sup>

| Compound                                               | M06-2X             |                               |                          |                               | CCSD(T)                       |                               |
|--------------------------------------------------------|--------------------|-------------------------------|--------------------------|-------------------------------|-------------------------------|-------------------------------|
|                                                        | E <sub>elect</sub> | H <sup>o</sup> <sub>298</sub> | S <sup>o</sup> cal/mol-K | G <sup>o</sup> <sub>298</sub> | G <sup>o</sup> <sub>298</sub> | G <sup>o</sup> <sub>423</sub> |
| BH <sub>2</sub> OCO <sup>-</sup>                       | -214.646259        | -214.608772                   | 63.815                   | -214.639092                   | -214.240451                   | -                             |
| CO...BH <sub>2</sub> O <sup>-</sup> (t.s.)             | -214.604234        | -214.570118                   | 66.438                   | -214.601685                   | -214.211247                   | -                             |
| BH <sub>2</sub> O <sup>-</sup>                         | -101.313762        | -101.289324                   | 52.748                   | -101.314386                   | -101.124955                   | -                             |
| CH <sub>2</sub> OCO                                    | -227.791897        | -227.748330                   | 62.907                   | -227.778219                   | -227.368992                   | -                             |
| CO...CH <sub>2</sub> O (t.s.)                          | -227.740414        | -227.699595                   | 64.302                   | -227.730147                   | -227.329268                   | -                             |
| CH <sub>2</sub> O                                      | -114.489926        | -114.458988                   | 52.201                   | -114.483791                   | -114.284132                   | -                             |
| CH <sub>2</sub> CH <sub>2</sub> CO                     | -191.857831        | -191.791513                   | 64.766                   | -191.822285                   | -191.446974                   | -                             |
| CO...CH <sub>2</sub> CH <sub>2</sub> (t.s.)            | -191.791775        | -191.728033                   | 66.496                   | -191.759628                   | -191.392983                   | -                             |
| CH <sub>2</sub> CH <sub>2</sub>                        | -78.566232         | -78.510912                    | 52.265                   | -78.535745                    | -78.370612                    | -                             |
| 2,3-di-tbu-CH <sub>2</sub> CH <sub>2</sub> CO          | -506.309730        | -506.006305                   | 118.630                  | -506.062670                   | -505.023619                   | -505.049355                   |
| CO...2,3-di-tbu-CH <sub>2</sub> CH <sub>2</sub> (t.s.) | -506.245396        | -505.944626                   | 118.481                  | -506.000920                   | -504.967490                   | -504.993434                   |
| Tetra-Me-3-hexene                                      | -393.018674        | -392.726091                   | 108.418                  | -392.777604                   | -391.944339                   | -391.968030                   |
| CO                                                     | -113.312701        | -113.304204                   | 47.176                   | -113.326619                   | -113.132977                   | -113.142619                   |

<sup>a</sup>6-311++G(2d,p) <sup>b</sup>See Table S2 for thermodynamic function definitions.

**Table S6.** Decarbonylation energy changes of 3-membered ring compounds (gas phase, kcal mol<sup>-1</sup>)<sup>a,b</sup>

| Reaction                                                                                                              | M06-2X                           |                                |                           |                                | CCSD(T)                        |                                |
|-----------------------------------------------------------------------------------------------------------------------|----------------------------------|--------------------------------|---------------------------|--------------------------------|--------------------------------|--------------------------------|
|                                                                                                                       | ΔE <sup>‡</sup> <sub>elect</sub> | ΔH <sup>‡</sup> <sub>298</sub> | ΔS <sup>‡</sup> cal/mol-K | ΔG <sup>‡</sup> <sub>298</sub> | ΔG <sup>‡</sup> <sub>298</sub> | ΔG <sup>‡</sup> <sub>423</sub> |
| BH <sub>2</sub> OCO <sup>-</sup> → CO...BH <sub>2</sub> O <sup>-</sup> (t.s.)                                         | 26.371                           | 24.256                         | 2.623                     | 23.473                         | 18.326111                      | -                              |
| CH <sub>2</sub> OCO → CO...CH <sub>2</sub> O (t.s.)                                                                   | 32.306                           | 30.582                         | 1.395                     | 30.166                         | 24.927179                      | -                              |
| CH <sub>2</sub> CH <sub>2</sub> CO → CO...CH <sub>2</sub> CH <sub>2</sub> (t.s.)                                      | 41.451                           | 39.834                         | 1.730                     | 39.318                         | 33.879518                      | -                              |
| trans-2,3-di-tbu-CH <sub>2</sub> CH <sub>2</sub> CO →<br>CO...trans-2,3-di-tbu-CH <sub>2</sub> CH <sub>2</sub> (t.s.) | 40.371                           | 38.704                         | -0.149                    | 38.749                         | 35.221730                      | 35.091171                      |
|                                                                                                                       | ΔE <sub>elect</sub>              | ΔH <sub>298</sub>              | ΔS <sup>o</sup> cal/mol-K | ΔG <sub>298</sub>              | ΔG <sup>o</sup> <sub>298</sub> | ΔG <sup>o</sup> <sub>423</sub> |
| BH <sub>2</sub> OCO <sup>-</sup> → CO + BH <sub>2</sub> O <sup>-</sup>                                                | 12.422                           | 9.566                          | 36.109                    | -1.200                         | -10.969394                     | -                              |
| CH <sub>2</sub> OCO → CO + CH <sub>2</sub> O                                                                          | -6.734                           | -9.326                         | 36.470                    | -20.200                        | -30.194053                     | -                              |
| CH <sub>2</sub> CH <sub>2</sub> CO → CO + CH <sub>2</sub> CH <sub>2</sub>                                             | -13.242                          | -14.811                        | 34.675                    | -25.150                        | -35.527106                     | -                              |
| trans-2,3-di-tbu-CH <sub>2</sub> CH <sub>2</sub> CO → CO +<br>tetraMe-3-hexene                                        | -13.582                          | -15.054                        | 36.964                    | -26.075                        | -33.695184                     | -38.462411                     |

<sup>a</sup>6-311++G(2d,p) <sup>b</sup>See Table S2 for thermodynamic function definitions.

**Table S7.** Cartesian coordinates of 3-membered ring compounds (M06-2X/6-311++G(2d,p), gas phase)

|                                                                |                                                                                                                                                                                                                                                                                                                                                                                                                                                                                                                                                                                                                                                                                                                                                                                                                                                                                                                                                                                                                                                                                                                     |                                                                                                                                                                                                                                                                                                                                                                                                                                                                                                             |                                                                                                                                                                                                                                                                                                                                                                                                                                                                                                                                                                                                                                                                                                                                                                                                                                                                                                                                                                                                                                                                                                                    |
|----------------------------------------------------------------|---------------------------------------------------------------------------------------------------------------------------------------------------------------------------------------------------------------------------------------------------------------------------------------------------------------------------------------------------------------------------------------------------------------------------------------------------------------------------------------------------------------------------------------------------------------------------------------------------------------------------------------------------------------------------------------------------------------------------------------------------------------------------------------------------------------------------------------------------------------------------------------------------------------------------------------------------------------------------------------------------------------------------------------------------------------------------------------------------------------------|-------------------------------------------------------------------------------------------------------------------------------------------------------------------------------------------------------------------------------------------------------------------------------------------------------------------------------------------------------------------------------------------------------------------------------------------------------------------------------------------------------------|--------------------------------------------------------------------------------------------------------------------------------------------------------------------------------------------------------------------------------------------------------------------------------------------------------------------------------------------------------------------------------------------------------------------------------------------------------------------------------------------------------------------------------------------------------------------------------------------------------------------------------------------------------------------------------------------------------------------------------------------------------------------------------------------------------------------------------------------------------------------------------------------------------------------------------------------------------------------------------------------------------------------------------------------------------------------------------------------------------------------|
| BH <sub>2</sub> COO <sup>-</sup>                               | 5 0.000072 -0.002007 -0.000013<br>1 -0.560708 -0.304478 1.028805<br>6 1.498987 0.377782 0.000007<br>8 2.715289 0.347177 0.000037<br>8 0.689938 1.422800 -0.000074<br>1 -0.560653 -0.304590 -1.028829                                                                                                                                                                                                                                                                                                                                                                                                                                                                                                                                                                                                                                                                                                                                                                                                                                                                                                                | CO...BH <sub>2</sub> O <sup>-</sup> (T.S.)                                                                                                                                                                                                                                                                                                                                                                                                                                                                  | 5 -0.063607 0.004674 -0.000008<br>1 -0.399467 -0.612610 1.018809<br>6 1.713568 0.150687 -0.000383<br>8 2.712243 0.733111 0.000102<br>8 0.206823 1.339690 -0.000118<br>1 -0.400190 -0.612711 -1.018501                                                                                                                                                                                                                                                                                                                                                                                                                                                                                                                                                                                                                                                                                                                                                                                                                                                                                                              |
| BH <sub>2</sub> O                                              | 5 0.000000 0.000000 0.014545<br>8 0.000000 0.000000 1.296008<br>1 0.000000 1.040387 -0.687452<br>1 0.000000 -1.040387 -0.687452                                                                                                                                                                                                                                                                                                                                                                                                                                                                                                                                                                                                                                                                                                                                                                                                                                                                                                                                                                                     |                                                                                                                                                                                                                                                                                                                                                                                                                                                                                                             |                                                                                                                                                                                                                                                                                                                                                                                                                                                                                                                                                                                                                                                                                                                                                                                                                                                                                                                                                                                                                                                                                                                    |
| CH <sub>2</sub> OCO<br>acetolactone                            | 6 1.028374 -0.576382 0.000004<br>6 -0.328105 -0.070783 -0.000066<br>8 0.605702 0.864521 0.000021<br>8 -1.504574 -0.156771 0.000017<br>1 1.494759 -0.889460 -0.925462<br>1 1.494603 -0.889549 0.925523                                                                                                                                                                                                                                                                                                                                                                                                                                                                                                                                                                                                                                                                                                                                                                                                                                                                                                               | CO...CH <sub>2</sub> O (T.S.)                                                                                                                                                                                                                                                                                                                                                                                                                                                                               | 6 0.917221 -0.526796 0.000000<br>6 0.000000 0.662413 0.000000<br>8 -0.157927 -1.301946 0.000000<br>8 -0.919459 1.319507 0.000000<br>1 1.557882 -0.477091 0.898756<br>1 1.557882 -0.477091 -0.898756                                                                                                                                                                                                                                                                                                                                                                                                                                                                                                                                                                                                                                                                                                                                                                                                                                                                                                                |
| CH <sub>2</sub> O                                              | 6 0.000000 0.000000 -0.525579<br>8 0.000000 0.000000 0.670207<br>1 0.000000 0.940537 -1.104090<br>1 0.000000 -0.940537 -1.104090                                                                                                                                                                                                                                                                                                                                                                                                                                                                                                                                                                                                                                                                                                                                                                                                                                                                                                                                                                                    |                                                                                                                                                                                                                                                                                                                                                                                                                                                                                                             |                                                                                                                                                                                                                                                                                                                                                                                                                                                                                                                                                                                                                                                                                                                                                                                                                                                                                                                                                                                                                                                                                                                    |
| CH <sub>2</sub> CH <sub>2</sub> O<br>cyclopropanone            | 6 0.854899 -0.783929 0.000014<br>6 0.854897 0.783955 -0.000056<br>6 -0.382054 -0.000011 -0.000074<br>8 -1.572211 -0.000003 0.000029<br>1 1.152347 1.279454 0.915581<br>1 1.153226 1.280433 -0.914830<br>1 1.152459 -1.279918 -0.915311<br>1 1.153206 -1.280028 0.915023                                                                                                                                                                                                                                                                                                                                                                                                                                                                                                                                                                                                                                                                                                                                                                                                                                             | CO...CH <sub>2</sub> CH <sub>2</sub> (T.S.)                                                                                                                                                                                                                                                                                                                                                                                                                                                                 | 6 -0.831087 0.690088 -0.000002<br>6 -1.205803 -0.706819 0.000000<br>6 0.623576 0.341792 0.000008<br>8 1.615778 -0.251212 -0.000003<br>1 -1.182885 -1.253796 0.929077<br>1 -1.182880 -1.253798 -0.929075<br>1 -1.040280 1.283451 -0.889798<br>1 -1.040300 1.283465 0.889779                                                                                                                                                                                                                                                                                                                                                                                                                                                                                                                                                                                                                                                                                                                                                                                                                                         |
| CH <sub>2</sub> CH <sub>2</sub>                                | 6 0.000000 0.000000 0.661289<br>6 0.000000 0.000000 -0.661289<br>1 0.000000 0.923246 -1.228078<br>1 0.000000 -0.923246 -1.228078<br>1 0.000000 0.923246 1.228078<br>1 0.000000 -0.923246 1.228078                                                                                                                                                                                                                                                                                                                                                                                                                                                                                                                                                                                                                                                                                                                                                                                                                                                                                                                   |                                                                                                                                                                                                                                                                                                                                                                                                                                                                                                             |                                                                                                                                                                                                                                                                                                                                                                                                                                                                                                                                                                                                                                                                                                                                                                                                                                                                                                                                                                                                                                                                                                                    |
| C <sub>11</sub> H <sub>20</sub> O di-t-<br>butylcyclopropanone | 6 -0.049764 -0.015430 0.146923<br>1 1.225532 0.137893 -0.749337<br>6 0.534938 1.293520 -0.165666<br>8 0.484205 2.479821 -0.035043<br>1 1.037217 -0.012010 -1.811144<br>1 4.650532 -0.023195 -0.950108<br>6 3.643489 0.299025 -1.224877<br>1 3.468306 0.014626 -2.265037<br>1 3.598887 1.387978 -1.156920<br>6 2.903823 0.069319 1.144290<br>1 3.916985 -0.238731 1.410032<br>1 2.835922 1.152285 1.270180<br>1 2.223238 -0.405345 1.853654<br>6 2.655026 -1.865565 -0.423304<br>1 3.634560 -2.244368 -0.121831<br>1 1.897930 -2.330673 0.213084<br>1 2.471358 -2.179498 -1.453823<br>6 2.604317 -0.341528 -0.299869<br>6 -1.387397 -0.500528 -0.408643<br>6 -2.469404 -0.158108 0.619849<br>1 -3.448013 -0.497984 0.273032<br>1 -2.263224 -0.639683 1.578528<br>1 -2.516472 0.920550 0.783230<br>6 -1.729862 0.180609 -1.736252<br>1 -2.717301 -0.144075 -2.070281<br>1 -1.749608 1.267676 -1.630349<br>1 -1.019285 -0.078240 -2.523447<br>6 -1.310969 -2.015091 -0.610909<br>1 -2.257711 -2.400796 -0.996623<br>1 -0.522009 -2.271032 -1.322637<br>1 -1.095298 -2.523796 0.331950<br>1 0.160146 -0.375640 1.152736 | CO...C <sub>10</sub> H <sub>20</sub> di-t-<br>butylcyclopropanone<br>(T.S.)                                                                                                                                                                                                                                                                                                                                                                                                                                 | 6 -0.583212 0.098373 0.348043<br>6 0.563146 -0.157244 -0.486011<br>6 -0.327307 1.573299 0.186612<br>8 0.190789 2.584320 -0.068104<br>1 0.427528 -0.042566 -1.555975<br>1 3.932305 0.590389 -0.312350<br>6 2.891471 0.739573 -0.612293<br>1 2.846758 0.705590 -1.703498<br>1 2.581202 1.736273 -0.294512<br>6 2.095581 -0.293530 1.518285<br>1 3.134399 -0.441885 1.819663<br>1 1.774956 0.673937 1.915966<br>1 1.499674 -1.079866 1.989254<br>6 2.489901 -1.719344 -0.485303<br>1 3.538916 -1.866916 -0.210359<br>1 1.895253 -2.521779 -0.043719<br>1 2.409179 -1.798107 -1.571698<br>6 1.986054 -0.347087 -0.007146<br>6 -2.016156 -0.341397 -0.015940<br>6 -3.005509 0.315967 0.943984<br>1 -4.021751 -0.015365 0.722541<br>1 -2.782530 0.050933 1.980617<br>1 -2.976720 1.404139 0.855512<br>6 -2.346593 0.046086 -1.455774<br>1 -3.375146 -0.234067 -1.690780<br>1 -2.251661 1.126432 -1.604190<br>1 -1.688756 -0.460731 -2.163252<br>6 -2.056329 -1.861908 0.141604<br>1 -3.044721 -2.238846 -0.128241<br>1 -1.312811 -2.334879 -0.501714<br>1 -1.851826 -2.154547 1.174775<br>1 -0.406836 -0.089423 1.410415 |
| C <sub>10</sub> H <sub>20</sub> di-t-<br>butylethene           | 6 2.649672 -0.586565 -1.249891<br>1 1.983614 0.007051 0.000022<br>6 0.528207 -0.401397 0.000069<br>6 -0.528188 0.401335 0.000153<br>6 -1.983640 -0.007055 0.000013<br>6 -2.649733 0.587368 -1.249489<br>1 -3.719118 0.362273 -1.256093<br>1 -2.532034 1.673257 -1.274687<br>1 -2.203992 0.176092 -2.157296<br>6 -2.170928 -1.522447 -0.000347<br>1 -3.235834 -1.764773 -0.000525<br>1 -1.721637 -1.976876 -0.885980<br>1 -1.721779 -1.977252 0.885149<br>6 -2.649916 0.586768 1.249677<br>1 -3.719385 0.362018 1.255870                                                                                                                                                                                                                                                                                                                                                                                                                                                                                                                                                                                             | 1 -2.204617 0.174779 2.157386<br>1 -2.531879 1.672603 1.275668<br>1 -0.375114 1.479420 0.000292<br>1 0.375173 -1.479487 0.000024<br>6 2.170894 1.522449 0.000574<br>1 3.235809 1.764753 0.000591<br>1 1.721627 1.977406 -0.884789<br>1 1.721741 1.976741 0.886338<br>6 2.650004 -0.587527 1.249275<br>1 3.719428 -0.362608 1.255590<br>1 2.204632 -0.176236 2.157266<br>1 2.532139 -1.673402 1.274503<br>1 3.719087 -0.361597 -1.256320<br>1 2.531828 -1.672418 -1.275915<br>1 2.204005 -0.174570 -2.157412 |                                                                                                                                                                                                                                                                                                                                                                                                                                                                                                                                                                                                                                                                                                                                                                                                                                                                                                                                                                                                                                                                                                                    |
